# Supplementary material for: Reprogramming and redifferentiation of mucosal-associated invariant T cells reveal tumor inhibitory activity
Source: eLife. 2022 Apr 5;11:e70848. doi: 10.7554/eLife.70848 (PMC8983048; doi:10.7554/eLife.70848)
Supplement: Figure 1—figure supplement 1—source data 1. [file elife-70848-fig1-figsupp1-data1.xlsx]

## Sheet: Fig1_fig suppl 1I source data
See Fig1 source data file

## Sheet: Fig1_fig suppl 1F source data
day 0	day 8	day 18-20	day 23-29
150000	3000000	1600000	16000000
150000	4000000	3800000	9800000
150000	5000000	3400000	25000000
150000	2900000	6600000	25000000
150000	4400000	28000000	68000000

## Sheet: Fig1_fig suppl 1G source data
Sample	reMAIT	post-CFSE	actual time post-CFSE	FSC-A, SSC-A subset,Geom. Mean,B1-A,CFSE
2: HW2018-08-15-1.002.fcs	L7-1	0	0	252618
6: HW2018-08-16-1.002.fcs	L7-1	24h	23.5	119122
10: HW2018-08-17-1.002.fcs	L7-1	48h	47.5	21379
14: HW2018-08-18.002.fcs	L7-1	72h	73.5	3334.4
16: HW2018-08-19-1.002.fcs	L7-1	96h	97	833.9
18: HW2018-08-20-2.002.fcs	L7-1	120h	121	290.8
20: HW2018-08-21-2.002.fcs	L7-1	144h	145	153.8

## Sheet: Fig1_fig suppl 1J source data
										/4																									CXCL1	CCL2	CXCL9	CXCL10			CXCL13	CXCL6	CCL22
Name		5-OP-RU	A4.INF-g	A5.IL-5	A6.TNF-a	A7.IL-2	A8.IL-6	A10.IL-4	B2.IL-10	B3.IL-9	B4.IL-17A	B5.IL-17F	B6.IL-21	B7.IL-22	B9.IL-13		A4.IL-1a	A5.IL-1b	A6.IL-3	A7.IL-12p40	A8.IL-12p70	A10.IL23	B2.IL-7	B3.IL-11	B4.IL-27	B5.IL-33	B6.IFN-b	B7.GM-CSF	B9.TSLP		A4.RANTES	A5.MIP-3a	A6.Eotaxin	A7.TARC	A8.KC	A10.MCP-1	B2.MIG	B3.IP-10	B4.MIP-1a	B5.MIP-1b	B6.BLC	B7.LIX	B9.MDC
			pg/ml	pg/ml	pg/ml	pg/ml	pg/ml	pg/ml	pg/ml	pg/ml	pg/ml	pg/ml	pg/ml	pg/ml	pg/ml		pg/ml	pg/ml	pg/ml	pg/ml	pg/ml	pg/ml	pg/ml	pg/ml	pg/ml	pg/ml	pg/ml	pg/ml	pg/ml		pg/ml	pg/ml	pg/ml	pg/ml	pg/ml	pg/ml	pg/ml	pg/ml	pg/ml	pg/ml	pg/ml	pg/ml	pg/ml
HW2020-01-21-2.0009.fcs	CH27	3nM	<1.83	<1.86	7.91	112.56	1222.06	<1.86	2782.24	4.86	2.33	<2.01	<2.15	<1.90	5.66		<0.77	<0.73	4.17	<0.67	<0.89	<0.47	<0.54	<1.23	<0.50	2.14	<1.41	2.89	<2.01		3.38	<1.82	<1.90	<1.84	4.13	24.72	<2.20	2.97	1526.99	100.25	<1.56	11.82	1399.65
HW2020-01-21-2.0010.fcs		1	<1.83	<1.86	6.36	49.62	998.52	<1.86	2363.06	2.44	<1.70	<2.01	<2.15	<1.90	3.4		<0.77	<0.73	1.17	<0.67	<0.89	<0.47	<0.54	<1.23	<0.50	1.33	<1.41	<1.34	<2.01		2.05	<1.82	<1.90	<1.84	2.19	22.07	<2.20	<1.00	1258.68	60.87	<1.56	9.28	1439.69
HW2020-01-21-2.0011.fcs		0.3	<1.83	<1.86	5.56	19.89	1111.19	<1.86	2485.29	2.04	2.17	<2.01	<2.15	<1.90	<2.05		<0.77	<0.73	<0.70	<0.67	<0.89	<0.47	<0.54	<1.23	0.58	2.28	<1.41	<1.34	<2.01		<1.20	<1.82	<1.90	<1.84	3.62	13.36	<2.20	<1.00	1494.82	32.24	<1.56	11.37	1547.11
HW2020-01-21-2.0012.fcs		0.1	<1.83	<1.86	5.34	4.98	1072.79	<1.86	2554.78	1.77	<1.70	<2.01	<2.15	<1.90	<2.05		<0.77	<0.73	<0.70	<0.67	<0.89	<0.47	<0.54	<1.23	<0.50	<1.19	<1.41	<1.34	<2.01		<1.20	<1.82	<1.90	<1.84	<1.15	8.97	<2.20	<1.00	1296.74	9.29	<1.56	14.43	1576.82
HW2020-01-21-2.0013.fcs		0.03	<1.83	<1.86	4.76	<1.81	978.39	<1.86	2366.81	<1.77	<1.70	<2.01	<2.15	<1.90	<2.05		<0.77	<0.73	<0.70	<0.67	<0.89	<0.47	<0.54	<1.23	<0.50	<1.19	<1.41	<1.34	<2.01		<1.20	<1.82	<1.90	<1.84	2.32	10.27	<2.20	<1.00	1398.89	5.2	<1.56	11.2	1603.93
HW2020-01-21-2.0014.fcs		0.001	<1.83	<1.86	4.73	<1.81	856.37	<1.86	2285.39	<1.77	<1.70	<2.01	<2.15	<1.90	<2.05		<0.77	<0.73	<0.70	<0.67	<0.89	<0.47	<0.54	<1.23	<0.50	<1.19	<1.41	<1.34	<2.01		<1.20	<1.82	<1.90	<1.84	<1.15	8.35	<2.20	<1.00	1552.4	3.13	<1.56	11.51	1547.08
HW2020-01-21-2.0015.fcs		0.003	<1.83	<1.86	4.73	<1.81	822.14	<1.86	2295.08	<1.77	<1.70	<2.01	<2.15	<1.90	<2.05		<0.77	<0.73	<0.70	<0.67	<0.89	<0.47	<0.54	<1.23	<0.50	<1.19	<1.41	<1.34	<2.01		<1.20	<1.82	<1.90	<1.84	<1.15	5.52	<2.20	<1.00	1707.18	6.19	<1.56	6.01	1530.88
HW2020-01-21-2.0016.fcs		0	<1.83	<1.86	4.25	<1.81	922.64	<1.86	2572.87	<1.77	<1.70	<2.01	<2.15	<1.90	<2.05		<0.77	<0.73	<0.70	<0.67	<0.89	<0.47	<0.54	<1.23	<0.50	<1.19	<1.41	<1.34	<2.01		<1.20	<1.82	<1.90	<1.84	1.67	10.86	<2.20	<1.00	1536.75	2.16	<1.56	13.04	1599.09
HW2020-01-21-2.0017.fcs	CH27m	3nM	7.43	<1.86	13.99	457.58	3333.1	<1.86	3170.85	11.49	5.93	3.38	2.82	<1.90	13.11		<0.77	<0.73	11.82	<0.67	<0.89	<0.47	<0.54	<1.23	<0.50	<1.19	<1.41	5.35	<2.01		9.08	<1.82	<1.90	<1.84	5.11	23.6	<2.20	6.67	8161.48	170.97	<1.56	42.02	5093.37
HW2020-01-21-2.0018.fcs		1	4.71	<1.86	10.94	276.08	2472.8	<1.86	2567	4.57	3.85	2.9	<2.15	<1.90	9.29		<0.77	<0.73	7.24	<0.67	<0.89	<0.47	<0.54	<1.23	<0.50	<1.19	<1.41	3.07	<2.01		8.64	<1.82	<1.90	<1.84	5.65	30.42	<2.20	7.15	8188.64	163.08	<1.56	39.34	4621.06
HW2020-01-21-2.0019.fcs		0.3	2.73	<1.86	10.26	181.83	2613.09	<1.86	2774.87	6.16	3.65	2.48	<2.15	<1.90	9.34		<0.77	<0.73	3.31	<0.67	<0.89	<0.47	<0.54	<1.23	<0.50	<1.19	<1.41	2.24	<2.01		3.21	<1.82	<1.90	<1.84	2.42	17.41	<2.20	3.02	6747.98	106.87	<1.56	32.82	4737.75
HW2020-01-21-2.0020.fcs		0.1	<1.83	<1.86	9.91	95.6	2358.15	<1.86	2888.17	4.86	2.38	2.48	<2.15	<1.90	8.27		<0.77	<0.73	1.17	<0.67	<0.89	<0.47	<0.54	<1.23	<0.50	<1.19	<1.41	<1.34	<2.01		2.63	<1.82	<1.90	<1.84	1.88	15.87	<2.20	1.87	7213.91	70.5	<1.56	35.5	4470.48
HW2020-01-21-2.0021.fcs		0.03	<1.83	<1.86	10.12	46.62	2886.05	<1.86	3245.08	4.35	2.4	2.56	<2.15	<1.90	6.82		<0.77	<0.73	<0.70	<0.67	<0.89	<0.47	<0.54	<1.23	<0.50	<1.19	<1.41	<1.34	<2.01		<1.20	<1.82	<1.90	<1.84	<1.15	11.75	<2.20	<1.00	7708.65	34.89	<1.56	36.8	4762.84
HW2020-01-21-2.0022.fcs		0.001	<1.83	<1.86	9.36	16.83	2526.47	<1.86	3115.79	5.05	3.2	2.63	<2.15	<1.90	4.74		<0.77	<0.73	<0.70	0.85	<0.89	<0.47	<0.54	<1.23	<0.50	<1.19	<1.41	<1.34	<2.01		<1.20	<1.82	<1.90	<1.84	11.05	13.12	<2.20	<1.00	6289.69	19.02	<1.56	33.88	4931.38
HW2020-01-21-2.0023.fcs		0.003	<1.83	<1.86	8.97	6.72	2678.63	<1.86	3129.11	2.44	2.33	<2.01	<2.15	<1.90	2.37		<0.77	<0.73	<0.70	<0.67	<0.89	<0.47	<0.54	<1.23	<0.50	<1.19	<1.41	<1.34	<2.01		<1.20	<1.82	<1.90	<1.84	<1.15	<1.14	<2.20	<1.00	24.94	<1.71	<1.56	<2.15	22.8
HW2020-01-21-2.0024.fcs		0	<1.83	<1.86	7.44	3.72	2074.5	<1.86	2888.97	1.94	2.32	<2.01	<2.15	<1.90	2.35		<0.77	<0.73	<0.70	<0.67	<0.89	<0.47	<0.54	<1.23	<0.50	<1.19	<1.41	<1.34	<2.01		<1.20	<1.82	<1.90	<1.84	<1.15	9.24	<2.20	<1.00	7251.6	10.58	<1.56	31.14	3979.35
