# Supplementary material for: Reprogramming and redifferentiation of mucosal-associated invariant T cells reveal tumor inhibitory activity
Source: eLife. 2022 Apr 5;11:e70848. doi: 10.7554/eLife.70848 (PMC8983048; doi:10.7554/eLife.70848)
Supplement: Figure 1—source data 1. — The type of antigen-presenting cell (APC), reMAIT cells, and the concentration of 5-(2-oxopropylideneamino)-6-D-ribitylaminouracil (5-OP-RU) (nM) used for activation assays. Activation is shown as the percentage of CD69+ cells among reMAIT cells (B). The percentage of CD69+ MAIT cells challenged with 5-OP-RU in the presence of isotype control or anti-MR1 antibody (in the presence of CH27m as APC) (C). The percentage of CD69+ MAIT cells challenged with 5-OP-RU or mMR1-tet (D, E). Production of the cytokines and chemokines from m-reMAIT cells challenged with 5-OP-RU or mMR1-tet (F). MAIT: mucosal-associated invariant T cell. [file elife-70848-fig1-data1.xlsx]

## Sheet: Fig1B & fig suppl 1I (WT)
Sample	APC	reMAIT	5-OP-RU conc	CD44+CD69+	CD44-CD69+		CD69+
1: HW2018-07-04-1.001.fcs	WT3m	L3-1	0	1.2	14.6		15.8
2: HW2018-07-04-1.002.fcs	WT3m	L3-1	1e-05	1.1	14.1		15.2
3: HW2018-07-04-1.003.fcs	WT3m	L3-1	0.0001	1.3	12.2		13.5
4: HW2018-07-04-1.004.fcs	WT3m	L3-1	0.001	2.1	12		14.1
5: HW2018-07-04-1.005.fcs	WT3m	L3-1	0.01	18.7	32.2		50.9
6: HW2018-07-04-1.006.fcs	WT3m	L3-1	0.1	50.5	31.5		82
7: HW2018-07-04-1.007.fcs	WT3m	L3-1	1	67.9	17.6		85.5
8: HW2018-07-04-1.008.fcs	WT3m	L7-1	0	0.3	0.8		1.1
9: HW2018-07-04-1.009.fcs	WT3m	L7-1	1e-05	0.4	0.8		1.2
10: HW2018-07-04-1.010.fcs	WT3m	L7-1	0.0001	0.2	0.7		0.9
11: HW2018-07-04-1.011.fcs	WT3m	L7-1	0.001	0.5	1.6		2.1
12: HW2018-07-04-1.012.fcs	WT3m	L7-1	0.01	5	13.8		18.8
13: HW2018-07-04-1.013.fcs	WT3m	L7-1	0.1	11.2	30.4		41.6
14: HW2018-07-04-1.014.fcs	WT3m	L7-1	1	17.4	40.9		58.3
15: HW2018-07-04-1.015.fcs	WT3m	L11-1	0	0.6	1.6		2.2
16: HW2018-07-04-1.016.fcs	WT3m	L11-1	1e-05	0.5	1.4		1.9
17: HW2018-07-04-1.017.fcs	WT3m	L11-1	0.0001	0.4	1.4		1.8
18: HW2018-07-04-1.018.fcs	WT3m	L11-1	0.001	0.5	1.7		2.2
19: HW2018-07-04-1.019.fcs	WT3m	L11-1	0.01	4.4	10.8		15.2
20: HW2018-07-04-1.020.fcs	WT3m	L11-1	0.1	14.9	30.9		45.8
21: HW2018-07-04-1.021.fcs	WT3m	L11-1	1	19	39.5		58.5
22: HW2018-07-04-1.022.fcs	WT3m	L15-1	0	0.6	4.3		4.9
23: HW2018-07-04-1.023.fcs	WT3m	L15-1	1e-05	0.5	2.7		3.2
24: HW2018-07-04-1.024.fcs	WT3m	L15-1	0.0001	0.3	2.7		3
25: HW2018-07-04-1.025.fcs	WT3m	L15-1	0.001	0.6	3		3.6
26: HW2018-07-04-1.026.fcs	WT3m	L15-1	0.01	19.2	24.8		44
27: HW2018-07-04-1.027.fcs	WT3m	L15-1	0.1	38.8	30.5		69.3
28: HW2018-07-04-1.028.fcs	WT3m	L15-1	1	51.9	24.7		76.6
29: HW2018-07-04-1.029.fcs	WT3m	L19-1	0	0.1	0.4		0.5
30: HW2018-07-04-1.030.fcs	WT3m	L19-1	1e-05	0.1	0.4		0.5
31: HW2018-07-04-1.031.fcs	WT3m	L19-1	0.0001	0.2	0.4		0.6
32: HW2018-07-04-1.032.fcs	WT3m	L19-1	0.001	0.1	0.5		0.6
33: HW2018-07-04-1.033.fcs	WT3m	L19-1	0.01	0.2	3.1		3.3
34: HW2018-07-04-1.034.fcs	WT3m	L19-1	0.1	0.7	15.7		16.4
35: HW2018-07-04-1.035.fcs	WT3m	L19-1	1	0.8	30.1		30.9
36: HW2018-07-04-1.036.fcs	WT3	L3-1	0	0.3	0.7		1
37: HW2018-07-04-1.037.fcs	WT3	L3-1	1e-05	0.2	0.7		0.9
38: HW2018-07-04-1.038.fcs	WT3	L3-1	0.0001	0.2	0.6		0.8
39: HW2018-07-04-1.039.fcs	WT3	L3-1	0.001	0.2	0.6		0.8
40: HW2018-07-04-1.040.fcs	WT3	L3-1	0.01	0.6	0.8		1.4
41: HW2018-07-04-1.041.fcs	WT3	L3-1	0.1	0.3	1.3		1.6
42: HW2018-07-04-1.042.fcs	WT3	L3-1	1	3.8	17.7		21.5
43: HW2018-07-04-1.043.fcs	WT3	L7-1	0	0.1	0.3		0.4
44: HW2018-07-04-1.044.fcs	WT3	L7-1	1e-05	0.1	0.4		0.5
45: HW2018-07-04-1.045.fcs	WT3	L7-1	0.0001	0.1	0.3		0.4
46: HW2018-07-04-1.046.fcs	WT3	L7-1	0.001	0.6	0.5		1.1
47: HW2018-07-04-1.047.fcs	WT3	L7-1	0.01	0.1	0.5		0.6
48: HW2018-07-04-1.048.fcs	WT3	L7-1	0.1	0.5	3.2		3.7
49: HW2018-07-04-1.049.fcs	WT3	L7-1	1	5.2	20.7		25.9
50: HW2018-07-04-1.050.fcs	WT3	L11-1	0	0.2	0.6		0.8
51: HW2018-07-04-1.051.fcs	WT3	L11-1	1e-05	0.1	0.4		0.5
52: HW2018-07-04-1.052.fcs	WT3	L11-1	0.0001	0.3	0.4		0.7
53: HW2018-07-04-1.053.fcs	WT3	L11-1	0.001	0.2	0.4		0.6
54: HW2018-07-04-1.054.fcs	WT3	L11-1	0.01	0.1	0.9		1
55: HW2018-07-04-1.055.fcs	WT3	L11-1	0.1	1.1	6.2		7.3
56: HW2018-07-04-1.056.fcs	WT3	L11-1	1	8.9	22.4		31.3
57: HW2018-07-04-1.057.fcs	WT3	L15-1	0	0.2	0.4		0.6
58: HW2018-07-04-1.058.fcs	WT3	L15-1	1e-05	0.1	0.3		0.4
59: HW2018-07-04-1.059.fcs	WT3	L15-1	0.0001	0.3	0.3		0.6
60: HW2018-07-04-1.060.fcs	WT3	L15-1	0.001	0.1	0.3		0.4
61: HW2018-07-04-1.061.fcs	WT3	L15-1	0.01	0.2	0.4		0.6
62: HW2018-07-04-1.062.fcs	WT3	L15-1	0.1	0.5	1.9		2.4
63: HW2018-07-04-1.063.fcs	WT3	L15-1	1	20.1	33.2		53.3
64: HW2018-07-04-1.064.fcs	WT3	L19-1	0	0.1	0.3		0.4
65: HW2018-07-04-1.065.fcs	WT3	L19-1	1e-05	0.1	0.4		0.5
66: HW2018-07-04-1.066.fcs	WT3	L19-1	0.0001	0.1	0.3		0.4
67: HW2018-07-04-1.067.fcs	WT3	L19-1	0.001	0.1	0.4		0.5
68: HW2018-07-04-1.068.fcs	WT3	L19-1	0.01	0.1	0.6		0.7
69: HW2018-07-04-1.069.fcs	WT3	L19-1	0.1	0.2	4.3		4.5
70: HW2018-07-04-1.070.fcs	WT3	L19-1	1	0.9	20.5		21.4

## Sheet: Fig1B & fig suppl 1I (CH27)
Sample	APC	reMAIT	ligand conc (nM)	CD25-CD69+	CD25+CD69+		CD69+
58: HW2018-06-28-1.058.fcs	CH27m	L11-1	0	4.3	0.9		5.2
53: HW2018-06-28-1.053.fcs	CH27m	L11-1	1e-05	5.4	1.2		6.6
48: HW2018-06-28-1.048.fcs	CH27m	L11-1	3e-05	7	1.7		8.7
43: HW2018-06-28-1.043.fcs	CH27m	L11-1	0.0001	8.2	2		10.2
38: HW2018-06-28-1.038.fcs	CH27m	L11-1	0.0003	11.2	2.2		13.4
33: HW2018-06-28-1.033.fcs	CH27m	L11-1	0.001	16.2	4.4		20.6
28: HW2018-06-28-1.028.fcs	CH27m	L11-1	0.003	23.9	5.9		29.8
23: HW2018-06-28-1.023.fcs	CH27m	L11-1	0.01	34.5	7.7		42.2
18: HW2018-06-28-1.018.fcs	CH27m	L11-1	0.03	43.1	9.3		52.4
13: HW2018-06-28-1.013.fcs	CH27m	L11-1	0.1	51.6	9.6		61.2
8: HW2018-06-28-1.008.fcs	CH27m	L11-1	0.3	55.9	9.8		65.7
3: HW2018-06-28-1.003.fcs	CH27m	L11-1	1	57.7	12.3		70
59: HW2018-06-28-1.059.fcs	CH27m	L15-1	0	16.3	11.4		27.7
54: HW2018-06-28-1.054.fcs	CH27m	L15-1	1e-05	17	10.3		27.3
49: HW2018-06-28-1.049.fcs	CH27m	L15-1	3e-05	18	12.7		30.7
44: HW2018-06-28-1.044.fcs	CH27m	L15-1	0.0001	21.1	12.4		33.5
39: HW2018-06-28-1.039.fcs	CH27m	L15-1	0.0003	21.2	13.2		34.4
34: HW2018-06-28-1.034.fcs	CH27m	L15-1	0.001	25.1	14.4		39.5
29: HW2018-06-28-1.029.fcs	CH27m	L15-1	0.003	30.4	16.1		46.5
24: HW2018-06-28-1.024.fcs	CH27m	L15-1	0.01	36.1	18.4		54.5
19: HW2018-06-28-1.019.fcs	CH27m	L15-1	0.03	43.3	19.6		62.9
14: HW2018-06-28-1.014.fcs	CH27m	L15-1	0.1	48.6	22.7		71.3
9: HW2018-06-28-1.009.fcs	CH27m	L15-1	0.3	47.7	25.6		73.3
4: HW2018-06-28-1.004.fcs	CH27m	L15-1	1	48.6	27.7		76.3
60: HW2018-06-28-1.060.fcs	CH27m	L19-1	0	3.6	1.1		4.7
55: HW2018-06-28-1.055.fcs	CH27m	L19-1	1e-05	3.7	1.3		5
50: HW2018-06-28-1.050.fcs	CH27m	L19-1	3e-05	4	1.2		5.2
45: HW2018-06-28-1.045.fcs	CH27m	L19-1	0.0001	5.8	1.5		7.3
40: HW2018-06-28-1.040.fcs	CH27m	L19-1	0.0003	8	2.9		10.9
35: HW2018-06-28-1.035.fcs	CH27m	L19-1	0.001	13.5	5.1		18.6
30: HW2018-06-28-1.030.fcs	CH27m	L19-1	0.003	20.3	8.4		28.7
25: HW2018-06-28-1.025.fcs	CH27m	L19-1	0.01	30.2	14		44.2
20: HW2018-06-28-1.020.fcs	CH27m	L19-1	0.03	41.2	16.1		57.3
15: HW2018-06-28-1.015.fcs	CH27m	L19-1	0.1	49.9	19.1		69
10: HW2018-06-28-1.010.fcs	CH27m	L19-1	0.3	55.2	22.1		77.3
5: HW2018-06-28-1.005.fcs	CH27m	L19-1	1	58.5	25.3		83.8
56: HW2018-06-28-1.056.fcs	CH27m	L3-1	0	19.2	15.6		34.8
51: HW2018-06-28-1.051.fcs	CH27m	L3-1	1e-05	19.3	15.6		34.9
46: HW2018-06-28-1.046.fcs	CH27m	L3-1	3e-05	19.7	14.7		34.4
41: HW2018-06-28-1.041.fcs	CH27m	L3-1	0.0001	22.1	17.8		39.9
36: HW2018-06-28-1.036.fcs	CH27m	L3-1	0.0003	22.2	18.5		40.7
31: HW2018-06-28-1.031.fcs	CH27m	L3-1	0.001	21.7	21		42.7
26: HW2018-06-28-1.026.fcs	CH27m	L3-1	0.003	22.8	21.4		44.2
21: HW2018-06-28-1.021.fcs	CH27m	L3-1	0.01	25.5	21.6		47.1
16: HW2018-06-28-1.016.fcs	CH27m	L3-1	0.03	28.7	22		50.7
11: HW2018-06-28-1.011.fcs	CH27m	L3-1	0.1	32.3	23.2		55.5
6: HW2018-06-28-1.006.fcs	CH27m	L3-1	0.3	33.7	31.9		65.6
1: HW2018-06-28-1.001.fcs	CH27m	L3-1	1	35.8	35.7		71.5
57: HW2018-06-28-1.057.fcs	CH27m	L7-1	0	3.9	2.7		6.6
52: HW2018-06-28-1.052.fcs	CH27m	L7-1	1e-05	4.3	2.7		7
47: HW2018-06-28-1.047.fcs	CH27m	L7-1	3e-05	4.7	2.9		7.6
42: HW2018-06-28-1.042.fcs	CH27m	L7-1	0.0001	6	3.6		9.6
37: HW2018-06-28-1.037.fcs	CH27m	L7-1	0.0003	8.3	5		13.3
32: HW2018-06-28-1.032.fcs	CH27m	L7-1	0.001	11.5	6.9		18.4
27: HW2018-06-28-1.027.fcs	CH27m	L7-1	0.003	18.7	9.8		28.5
22: HW2018-06-28-1.022.fcs	CH27m	L7-1	0.01	22.5	11.3		33.8
17: HW2018-06-28-1.017.fcs	CH27m	L7-1	0.03	31.2	13.4		44.6
12: HW2018-06-28-1.012.fcs	CH27m	L7-1	0.1	38.9	13.8		52.7
7: HW2018-06-28-1.007.fcs	CH27m	L7-1	0.3	44.7	18		62.7
2: HW2018-06-28-1.002.fcs	CH27m	L7-1	1	48.2	20.5		68.7
58: HW2018-06-28-3.058.fcs	CH27	L11-1	0	3.3	1.2		4.5
53: HW2018-06-28-3.053.fcs	CH27	L11-1	1e-05	3.6	1.1		4.7
48: HW2018-06-28-3.048.fcs	CH27	L11-1	3e-05	3	0.9		3.9
43: HW2018-06-28-3.043.fcs	CH27	L11-1	0.0001	3.8	0.9		4.7
38: HW2018-06-28-3.038.fcs	CH27	L11-1	0.0003	3.9	1		4.9
33: HW2018-06-28-3.033.fcs	CH27	L11-1	0.001	4.2	0.9		5.1
28: HW2018-06-28-3.028.fcs	CH27	L11-1	0.003	6.1	1.6		7.7
23: HW2018-06-28-3.023.fcs	CH27	L11-1	0.01	10	3.1		13.1
18: HW2018-06-28-3.018.fcs	CH27	L11-1	0.03	17.6	6.1		23.7
13: HW2018-06-28-3.013.fcs	CH27	L11-1	0.1	29.1	8.2		37.3
8: HW2018-06-28-3.008.fcs	CH27	L11-1	0.3	39.7	10.4		50.1
3: HW2018-06-28-3.003.fcs	CH27	L11-1	1	49.2	11.5		60.7
59: HW2018-06-28-3.059.fcs	CH27	L15-1	0	10.1	7.9		18
54: HW2018-06-28-3.054.fcs	CH27	L15-1	1e-05	10.2	7.6		17.8
49: HW2018-06-28-3.049.fcs	CH27	L15-1	3e-05	10.8	7.8		18.6
44: HW2018-06-28-3.044.fcs	CH27	L15-1	0.0001	11.5	8.3		19.8
39: HW2018-06-28-3.039.fcs	CH27	L15-1	0.0003	10.4	8.4		18.8
34: HW2018-06-28-3.034.fcs	CH27	L15-1	0.001	9.9	8		17.9
29: HW2018-06-28-3.029.fcs	CH27	L15-1	0.003	11.2	7.6		18.8
24: HW2018-06-28-3.024.fcs	CH27	L15-1	0.01	14.8	9.6		24.4
19: HW2018-06-28-3.019.fcs	CH27	L15-1	0.03	19.2	13.1		32.3
14: HW2018-06-28-3.014.fcs	CH27	L15-1	0.1	28.3	21.5		49.8
9: HW2018-06-28-3.009.fcs	CH27	L15-1	0.3	39.2	27.3		66.5
4: HW2018-06-28-3.004.fcs	CH27	L15-1	1	43.7	29.6		73.3
60: HW2018-06-28-3.060.fcs	CH27	L19-1	0	2.2	1.1		3.3
55: HW2018-06-28-3.055.fcs	CH27	L19-1	1e-05	2	0.7		2.7
50: HW2018-06-28-3.050.fcs	CH27	L19-1	3e-05	2.3	1.1		3.4
45: HW2018-06-28-3.045.fcs	CH27	L19-1	0.0001	2	1		3
40: HW2018-06-28-3.040.fcs	CH27	L19-1	0.0003	2.6	0.8		3.4
35: HW2018-06-28-3.035.fcs	CH27	L19-1	0.001	3	0.9		3.9
30: HW2018-06-28-3.030.fcs	CH27	L19-1	0.003	4.3	1.5		5.8
25: HW2018-06-28-3.025.fcs	CH27	L19-1	0.01	8.3	3.7		12
20: HW2018-06-28-3.020.fcs	CH27	L19-1	0.03	15.8	7		22.8
15: HW2018-06-28-3.015.fcs	CH27	L19-1	0.1	28.4	11.9		40.3
10: HW2018-06-28-3.010.fcs	CH27	L19-1	0.3	41	16.1		57.1
5: HW2018-06-28-3.005.fcs	CH27	L19-1	1	52	17.5		69.5
56: HW2018-06-28-3.056.fcs	CH27	L3-1	0	2.3	2.2		4.5
51: HW2018-06-28-3.051.fcs	CH27	L3-1	1e-05	2.4	1.5		3.9
46: HW2018-06-28-3.046.fcs	CH27	L3-1	3e-05	2.4	1.5		3.9
41: HW2018-06-28-3.041.fcs	CH27	L3-1	0.0001	2.3	1.5		3.8
36: HW2018-06-28-3.036.fcs	CH27	L3-1	0.0003	2.6	1.5		4.1
31: HW2018-06-28-3.031.fcs	CH27	L3-1	0.001	3	1.6		4.6
26: HW2018-06-28-3.026.fcs	CH27	L3-1	0.003	3.4	2.3		5.7
21: HW2018-06-28-3.021.fcs	CH27	L3-1	0.01	4.2	2.5		6.7
16: HW2018-06-28-3.016.fcs	CH27	L3-1	0.03	10.6	7.1		17.7
11: HW2018-06-28-3.011.fcs	CH27	L3-1	0.1	16.5	17.1		33.6
6: HW2018-06-28-3.006.fcs	CH27	L3-1	0.3	19.8	24.9		44.7
1: HW2018-06-28-3.001.fcs	CH27	L3-1	1	27.7	29.9		57.6
57: HW2018-06-28-3.057.fcs	CH27	L7-1	0	1.6	1.5		3.1
52: HW2018-06-28-3.052.fcs	CH27	L7-1	1e-05	2.1	1.7		3.8
47: HW2018-06-28-3.047.fcs	CH27	L7-1	3e-05	1.4	1.4		2.8
42: HW2018-06-28-3.042.fcs	CH27	L7-1	0.0001	2.1	1.5		3.6
37: HW2018-06-28-3.037.fcs	CH27	L7-1	0.0003	1.8	1.6		3.4
32: HW2018-06-28-3.032.fcs	CH27	L7-1	0.001	2.7	1.8		4.5
27: HW2018-06-28-3.027.fcs	CH27	L7-1	0.003	3.5	2.2		5.7
22: HW2018-06-28-3.022.fcs	CH27	L7-1	0.01	6.9	4.3		11.2
17: HW2018-06-28-3.017.fcs	CH27	L7-1	0.03	10.4	7.4		17.8
12: HW2018-06-28-3.012.fcs	CH27	L7-1	0.1	16.7	13		29.7
7: HW2018-06-28-3.007.fcs	CH27	L7-1	0.3	25.8	16.2		42
2: HW2018-06-28-3.002.fcs	CH27	L7-1	1	32.6	20.8		53.4

## Sheet: Fig1C source data
Sample	reMAIT	APC	5-OP-RU conc	Ab	CD25-CD69+	CD25+CD69+		CD69+
15: HW2019-02-19-1.076.fcs	L7-1	CH27m	0	isotype	8.2	1.1		9.3
40: HW2019-02-19-1.068.fcs	L7-1	CH27m	0.0001	isotype	8	1		9
53: HW2019-02-19-1.060.fcs	L7-1	CH27m	0.0003	isotype	9.5	1		10.5
80: HW2019-02-19-1.052.fcs	L7-1	CH27m	0.001	isotype	14.2	1.8		16
100: HW2019-02-19-1.044.fcs	L7-1	CH27m	0.003	isotype	19.4	2.4		21.8
111: HW2019-02-19-1.036.fcs	L7-1	CH27m	0.01	isotype	21.6	5.8		27.4
139: HW2019-02-19-1.028.fcs	L7-1	CH27m	0.03	isotype	30.8	21.7		52.5
158: HW2019-02-19-1.020.fcs	L7-1	CH27m	0.1	isotype	33.6	17		50.6
162: HW2019-02-19-1.012.fcs	L7-1	CH27m	0.3	isotype	42.8	16.3		59.1
185: HW2019-02-19-1.004.fcs	L7-1	CH27m	1	isotype	47.5	16		63.5
7: HW2019-02-19-1.075.fcs	L7-1	CH27m	0	anti MR1	2.7	0.8		3.5
26: HW2019-02-19-1.067.fcs	L7-1	CH27m	0.0001	anti MR1	2.3	0.7		3
42: HW2019-02-19-1.059.fcs	L7-1	CH27m	0.0003	anti MR1	2.8	0.5		3.3
69: HW2019-02-19-1.051.fcs	L7-1	CH27m	0.001	anti MR1	2.9	0.9		3.8
84: HW2019-02-19-1.043.fcs	L7-1	CH27m	0.003	anti MR1	3.1	0.6		3.7
103: HW2019-02-19-1.035.fcs	L7-1	CH27m	0.01	anti MR1	3.1	0.7		3.8
127: HW2019-02-19-1.027.fcs	L7-1	CH27m	0.03	anti MR1	4.7	1		5.7
151: HW2019-02-19-1.019.fcs	L7-1	CH27m	0.1	anti MR1	10.1	1.3		11.4
178: HW2019-02-19-1.011.fcs	L7-1	CH27m	0.3	anti MR1	21.6	8.6		30.2
197: HW2019-02-19-1.003.fcs	L7-1	CH27m	1	anti MR1	29.3	27.5		56.8

## Sheet: Fig1D&E source data
Sample	reMAIT	APC	5-OP-RU conc	CD25-CD69+	CD25+CD69+	CD69+
17: HW2020-01-18-1.0017.mqd	L7-1	none	300	12.2	78.6	90.8
18: HW2020-01-18-1.0018.mqd	L7-1	none	100	10.9	77.1	88
19: HW2020-01-18-1.0019.mqd	L7-1	none	30	12.5	67.4	79.9
20: HW2020-01-18-1.0020.mqd	L7-1	none	10	13.4	55	68.4
21: HW2020-01-18-1.0021.mqd	L7-1	none	3	11.3	37.6	48.9
22: HW2020-01-18-1.0022.mqd	L7-1	none	1	7.5	20	27.5
23: HW2020-01-18-1.0023.mqd	L7-1	none	0.3	4.3	12.5	16.8
24: HW2020-01-18-1.0024.mqd	L7-1	none	0	0.8	5.3	6.1
25: HW2020-01-18-1.0025.mqd	L7-1	MR1tetramer	1:100	12.9	75.6	88.5
26: HW2020-01-18-1.0026.mqd	L7-1	MR1tetramer	1:300	13	76.9	89.9
27: HW2020-01-18-1.0027.mqd	L7-1	MR1tetramer	1:1000	14.8	71.9	86.7
28: HW2020-01-18-1.0028.mqd	L7-1	MR1tetramer	1:3000	17.3	59.8	77.1
29: HW2020-01-18-1.0029.mqd	L7-1	MR1tetramer	1:10000	12.7	42.7	55.4
30: HW2020-01-18-1.0030.mqd	L7-1	MR1tetramer	1:30000	6.7	26.2	32.9
31: HW2020-01-18-1.0031.mqd	L7-1	MR1tetramer	1:100000	3.4	12.4	15.8
32: HW2020-01-18-1.0032.mqd	L7-1	MR1tetramer	0	0.4	3.1	3.5
Mean				9.7	38.5
StdDev				5.4	26

## Sheet: Fig1F source data
										/4												x5	x5	x5	x5	x5	x5		x5
Name			A4.IFN-g	A5.IL-5	A6.TNF-a	A7.IL-2	A8.IL-6	A10.IL-4	B2.IL-10	B3.IL-9	B4.IL-17A	B5.IL-17F	B6.IL-21	B7.IL-22	B9.IL-13		A4.IL-1a	A5.IL-1b	A6.IL-3	A7.IL-12p40	A8.IL-12p70	A10.IL-23	B2.IL-7	B3.IL-11	B4.IL-27	B5.IL-33	B6.IFN-b	B7.GM-CSF	B9.TSLP		A4.RANTES	A5.MIP-3a	A6.Eotaxin	A7.TARC	A8.CXCL1	A10.CL2	B2.CXCL9	B3.CXCL10	B4.MIP-1a	B5.MIP-1b	B6.CXCL13	B7.CXCL6	B9.CCL22
			pg/ml	pg/ml	pg/ml	pg/ml	pg/ml	pg/ml	pg/ml	pg/ml	pg/ml	pg/ml	pg/ml	pg/ml	pg/ml		pg/ml	pg/ml	pg/ml	pg/ml	pg/ml	pg/ml	pg/ml	pg/ml	pg/ml	pg/ml	pg/ml	pg/ml	pg/ml		pg/ml	pg/ml	pg/ml	pg/ml	pg/ml	pg/ml	pg/ml	pg/ml	pg/ml	pg/ml	pg/ml	pg/ml	pg/ml
HW2020-01-21-2.0025.fcs	reMAIT only	300nM	3.47	<1.86	<1.92	39.81	4.49	5.64	<1.77	<1.77	<1.70	<2.01	<2.15	<1.90	<2.05		<0.77	0.96	<0.70	<0.67	<0.89	<0.47	<0.54	<1.23	<0.50	<1.19	<1.41	<1.34	<2.01		1.57	<1.82	<1.90	<1.84	2.24	15.79	<2.20	<1.00	167.49	110	<1.56	<2.15	<1.14
HW2020-01-21-2.0026.fcs		100	1.92	<1.86	<1.92	38.42	2.94	5.17	<1.77	<1.77	<1.70	<2.01	<2.15	<1.90	<2.05		<0.77	<0.73	<0.70	<0.67	<0.89	<0.47	<0.54	<1.23	<0.50	<1.19	<1.41	<1.34	<2.01		<1.20	<1.82	<1.90	<1.84	<1.15	13.36	<2.20	<1.00	114.98	88.19	<1.56	<2.15	<1.14
HW2020-01-21-2.0027.fcs		30	<1.83	<1.86	<1.92	37.64	2.31	3.88	<1.77	<1.77	<1.70	<2.01	<2.15	<1.90	<2.05		<0.77	<0.73	<0.70	<0.67	<0.89	<0.47	<0.54	<1.23	<0.50	<1.19	<1.41	<1.34	<2.01		<1.20	<1.82	<1.90	<1.84	<1.15	13.9	<2.20	<1.00	101.34	84.12	<1.56	<2.15	<1.14
HW2020-01-21-2.0028.fcs		10	<1.83	<1.86	<1.92	32.37	<1.84	2.53	<1.77	<1.77	<1.70	<2.01	<2.15	<1.90	<2.05		<0.77	<0.73	<0.70	<0.67	<0.89	<0.47	<0.54	<1.23	<0.50	<1.19	<1.41	<1.34	<2.01		<1.20	<1.82	<1.90	<1.84	<1.15	14.94	<2.20	<1.00	85.66	75.21	<1.56	<2.15	<1.14
HW2020-01-21-2.0029.fcs		3	<1.83	<1.86	<1.92	22.12	<1.84	<1.86	<1.77	<1.77	<1.70	<2.01	<2.15	<1.90	<2.05		<0.77	<0.73	<0.70	<0.67	<0.89	<0.47	<0.54	<1.23	<0.50	<1.19	<1.41	<1.34	<2.01		<1.20	<1.82	<1.90	<1.84	<1.15	10.97	<2.20	<1.00	73.43	72.22	<1.56	<2.15	<1.14
HW2020-01-21-2.0030.fcs		1	<1.83	<1.86	<1.92	15.31	<1.84	<1.86	<1.77	<1.77	<1.70	<2.01	<2.15	<1.90	<2.05		<0.77	<0.73	<0.70	<0.67	<0.89	<0.47	<0.54	<1.23	<0.50	<1.19	<1.41	<1.34	<2.01		<1.20	<1.82	<1.90	<1.84	1.73	12.27	<2.20	<1.00	34.68	41.64	<1.56	<2.15	<1.14
HW2020-01-21-2.0031.fcs		0.3	<1.83	<1.86	<1.92	3.76	<1.84	<1.86	<1.77	<1.77	<1.70	<2.01	<2.15	<1.90	<2.05		<0.77	<0.73	<0.70	<0.67	<0.89	<0.47	<0.54	<1.23	<0.50	<1.19	<1.41	<1.34	<2.01		<1.20	<1.82	<1.90	<1.84	<1.15	7.49	<2.20	<1.00	12.44	19.78	<1.56	<2.15	<1.14
HW2020-01-21-2.0032.fcs		0	<1.83	<1.86	<1.92	<1.81	<1.84	<1.86	1.87	<1.77	<1.70	<2.01	<2.15	<1.90	<2.05		<0.77	<0.73	<0.70	<0.67	<0.89	<0.47	<0.54	<1.23	<0.50	<1.19	<1.41	<1.34	<2.01		<1.20	<1.82	<1.90	<1.84	<1.15	<1.14	<2.20	<1.00	<1.63	<1.71	<1.56	<2.15	<1.14
HW2020-01-21-2.0033.fcs	MR1tet	1:100	6.1	<1.86	7.62	44.9	29.24	7.21	25.65	2.93	2.55	18.55	3.4	7.41	12.17		<0.77	2.66	0.87	1.56	<0.89	6.67	1.07	2.26	<0.50	8.85	<1.41	<1.34	3.88		7.17	<1.82	<1.90	<1.84	70.08	51.42	<2.20	<1.00	188.13	113.55	2.73	23.3	<1.14
HW2020-01-21-2.0034.fcs		1:300	3.85	<1.86	3.74	45	19.95	6.59	9.7	<1.77	<1.70	7.08	<2.15	3.22	5.4		<0.77	<0.73	<0.70	<0.67	<0.89	2.13	<0.54	<1.23	<0.50	<1.19	<1.41	<1.34	<2.01		3.88	<1.82	<1.90	<1.84	44.14	39.46	<2.20	<1.00	182.62	123.33	<1.56	7.72	1.86
HW2020-01-21-2.0035.fcs		1:1000	<1.83	<1.86	<1.92	36.2	14.66	4.87	2.65	<1.77	<1.70	<2.01	<2.15	<1.90	<2.05		<0.77	<0.73	<0.70	<0.67	<0.89	<0.47	<0.54	<1.23	<0.50	<1.19	<1.41	<1.34	<2.01		3.81	<1.82	<1.90	<1.84	25.54	36.45	<2.20	<1.00	134.59	98.15	<1.56	<2.15	<1.14
HW2020-01-21-2.0036.fcs		1:3000	<1.83	<1.86	<1.92	31.16	7.35	2.87	<1.77	<1.77	<1.70	<2.01	<2.15	<1.90	<2.05		<0.77	<0.73	<0.70	<0.67	<0.89	<0.47	<0.54	<1.23	<0.50	<1.19	<1.41	<1.34	<2.01		1.38	<1.82	<1.90	<1.84	8.8	29.96	<2.20	<1.00	114.8	88.95	<1.56	<2.15	<1.14
HW2020-01-21-2.0037.fcs		1:10000	<1.83	<1.86	<1.92	19.19	<1.84	<1.86	<1.77	<1.77	<1.70	<2.01	<2.15	<1.90	<2.05		<0.77	<0.73	<0.70	<0.67	<0.89	<0.47	<0.54	<1.23	<0.50	<1.19	<1.41	<1.34	<2.01		<1.20	<1.82	<1.90	<1.84	3.12	18.36	<2.20	<1.00	83.95	75.93	<1.56	<2.15	<1.14
HW2020-01-21-2.0038.fcs		1:30000	<1.83	<1.86	<1.92	7.25	1.98	<1.86	<1.77	<1.77	<1.70	<2.01	<2.15	<1.90	<2.05		<0.77	<0.73	<0.70	<0.67	<0.89	<0.47	<0.54	<1.23	<0.50	<1.19	<1.41	<1.34	<2.01		<1.20	<1.82	<1.90	<1.84	2.51	10.43	<2.20	<1.00	30.34	39.18	<1.56	<2.15	<1.14
HW2020-01-21-2.0039.fcs		1:100000	<1.83	<1.86	<1.92	<1.81	<1.84	<1.86	<1.77	<1.77	<1.70	<2.01	<2.15	<1.90	<2.05		<0.77	<0.73	<0.70	<0.67	<0.89	<0.47	<0.54	<1.23	<0.50	<1.19	<1.41	<1.34	<2.01		<1.20	<1.82	<1.90	<1.84	2.12	6.88	<2.20	<1.00	6.56	12.97	<1.56	<2.15	<1.14
HW2020-01-21-2.0040.fcs		0	<1.83	<1.86	<1.92	<1.81	<1.84	<1.86	<1.77	<1.77	<1.70	<2.01	<2.15	<1.90	<2.05		<0.77	<0.73	<0.70	<0.67	<0.89	<0.47	<0.54	<1.23	<0.50	<1.19	<1.41	<1.34	<2.01		1.32	<1.82	<1.90	<1.84	32.02	51.71	<2.20	<1.00	<1.63	<1.71	<1.56	23.05	<1.14
