# Supplementary material for: Reprogramming and redifferentiation of mucosal-associated invariant T cells reveal tumor inhibitory activity
Source: eLife. 2022 Apr 5;11:e70848. doi: 10.7554/eLife.70848 (PMC8983048; doi:10.7554/eLife.70848)
Supplement: Figure 2—figure supplement 2—source data 1. — The numbers in the left columns show the expression level of the gene as defined log (FPKM), and those in the right columns indicate the scaled expression level. p-Value was calculated with TTC. The ratio between groups exhibiting the most different expression level among the three cell types is shown. [file elife-70848-fig2-figsupp2-data1.xlsx]

## Sheet: spleen
	L7_W.O_5OPRU	L7_Ly5.2_Sp	L7_Ly5.1_Sp	p.value	ratio	scale_L7_W.O_5OPRU	scale_L7_Ly5.2_Sp	scale_L7_Ly5.1_Sp
Il7r	-3.51242	0.0810756	-0.133072	0.59332	29.3517	-1.15307	0.629654	0.523416
Il12rb2_3	29.2025	30.2748	31.3074	0.523638	8.20637	-1.00625	0.0126102	0.993635
Il18r1_1	-2.04603	-0.113262	-0.49454	0.59332	4.71849	-1.1345	0.753472	0.38103
Il18r1_2	38.8441	42.2228	41.6712	0.267938	16.896	-1.14125	0.722791	0.418463
Il18rap	-4.28964	0.561787	0.87125	0.447178	174.319	-1.15305	0.523067	0.629983
Prf1	-1.50646	1.50195	2.15515	0.221044	38.9241	-1.13844	0.401986	0.736453
Gzmb_1	-4.88619	-0.065301	-0.31898	0.59332	96.275	-1.15344	0.62347	0.529968
Gzmb_2	-4.37223	0.125432	-0.816294	0.458825	35.0207	-1.13172	0.764364	0.367359
Tnf	-3.13858	0.400398	0.641111	0.481494	43.8024	-1.15283	0.51954	0.633291
Ifng	-3.24654	1.68884	2.19442	0.221139	230.665	-1.15061	0.491211	0.6594
Il22	-4.19748	-1.26091	-1.99889	1	9.01234	-1.12051	0.801799	0.318711
Slamf7	-16.7348	3.22345	4.17889	0.0653738	1.20975e+09	-1.15376	0.536422	0.617333
Abcb1a_1	-3.04523	-0.271969	1.49591	0.324179	93.7975	-1.06513	0.146404	0.918728
Rorc	2.79133	-0.531064	-1.40127	0.090934	0.015107	1.13215	-0.369429	-0.762725
Zbtb16_1	-2.47596	-0.503171	0.936753	0.390874	30.3473	-1.0478	0.103673	0.944125
Zbtb16_2	-2.12324	-1.04325	1.03079	0.202646	23.4303	-0.880485	-0.20672	1.0872
Zbtb16_3	-3.37116	0.343964	0.408199	0.481494	43.7878	-1.15457	0.562443	0.59213
Tbx21	-3.82044	1.84687	2.11491	0.229608	378.173	-1.15378	0.536908	0.61687
Zfp683	-2.47462	1.28943	3.53709	0.0710764	408.182	-1.07276	0.166403	0.90636

## Sheet: Liver
	L7_W.O_5OPRU	L7_Ly5.2_Liv	L7_Ly5.1_Liv	p.value	ratio	scale_L7_W.O_5OPRU	scale_L7_Ly5.2_Liv	scale_L7_Ly5.1_Liv
Il7r	-3.51242	0.365738	0.208516	0.61586	41.3031	-1.15396	0.612792	0.541167
Il12rb2_3	29.2025	31.9552	31.7905	0.448513	13.3039	-1.15306	0.629854	0.523203
Il18r1_1	-2.04603	1.0978	0.913955	0.43388	19.2976	-1.15313	0.628664	0.524469
Il18r1_2	38.8441	43.715	43.9208	0.144084	160.239	-1.15396	0.541165	0.612795
Il18rap	-4.28964	2.11611	1.49974	0.284626	326.81	-1.1503	0.662358	0.487943
Prf1	-1.50646	3.03828	2.95726	0.168087	86.8102	-1.15456	0.592855	0.561706
Gzmb_1	-4.88619	3.43464	3.2844	0.139495	3535.41	-1.15456	0.593056	0.561501
Gzmb_2	-4.37223	3.4333	2.75712	0.147194	1248.07	-1.15117	0.653761	0.497405
Tnf	-3.13858	0.286091	1.47969	0.36788	101.319	-1.11835	0.310223	0.808123
Ifng	-3.24654	3.53525	3.61096	0.126216	950.989	-1.15465	0.56771	0.586938
Il22	-4.19748	0.0208886	2.39987	0.177994	733.156	-1.07905	0.183509	0.895536
Slamf7	-16.7348	4.54196	4.56065	0.0767471	1.77212e+09	-1.1547	0.57659	0.578111
Abcb1a_1	-3.04523	0.357586	2.43547	0.177994	240.014	-1.07021	0.159616	0.910592
Rorc	2.79133	-0.339417	1.11758	0.437399	0.187544	1.02226	-0.976144	-0.0461164
Zbtb16_1	-2.47596	0.470314	2.21562	0.246997	109.024	-1.07367	0.168822	0.904843
Zbtb16_2	-2.12324	-1.06686	1.6823	0.155713	44.9494	-0.824956	-0.287226	1.11218
Zbtb16_3	-3.37116	-1.83636	1.93659	0.116034	201.895	-0.83505	-0.27314	1.10819
Tbx21	-3.82044	2.57519	2.84001	0.19227	780.905	-1.15399	0.541884	0.612104
Zfp683	-2.47462	2.11501	4.7462	0.0470127	1367.62	-1.07728	0.178636	0.898643

## Sheet: LPL
	L7_W.O_5OPRU	L7_Ly5.2_LPL	L7_Ly5.1_LPL	p.value	ratio	scale_L7_W.O_5OPRU	scale_L7_Ly5.2_LPL	scale_L7_Ly5.1_LPL
Il7r	-3.51242	0.311156	0.893124	0.528261	81.9039	-1.14613	0.451484	0.69465
Il12rb2_3	29.2025	31.3581	31.9007	0.509758	14.8538	-1.13364	0.376709	0.756933
Il18r1_1	-2.04603	0.79879	1.24862	0.451215	26.9678	-1.14551	0.446863	0.698651
Il18r1_2	38.8441	42.6813	42.9351	0.270936	59.7972	-1.15293	0.521109	0.631821
Il18rap	-4.28964	-0.0396997	0.983984	0.447927	195.121	-1.13519	0.384565	0.750629
Prf1	-1.50646	0.568808	1.99058	0.311551	33.0177	-1.05616	0.123861	0.9323
Gzmb_1	-4.88619	1.26725	2.17392	0.290214	1164.57	-1.14663	0.455299	0.691332
Gzmb_2	-4.37223	2.39139	2.54156	0.237161	1006.05	-1.15449	0.558233	0.596258
Tnf	-3.13858	-0.0197948	0.929132	0.447927	58.423	-1.12564	0.339869	0.785767
Ifng	-3.24654	1.40655	1.59837	0.361197	127.092	-1.15399	0.542039	0.611956
Il22	-4.19748	4.95971	6.18188	0.045062	32188.5	-1.14798	0.466267	0.681714
Slamf7	-16.7348	3.15879	4.82139	0.0782497	2.30001e+09	-1.15192	0.506654	0.645269
Abcb1a_1	-3.04523	2.69473	2.27346	0.229374	204.114	-1.1522	0.641936	0.510259
Rorc	2.79133	1.15734	2.0237	0.755752	0.464114	0.979263	-1.01952	0.0402584
Zbtb16_1	-2.47596	0.969839	1.7142	0.345561	66.0332	-1.13859	0.402806	0.735779
Zbtb16_2	-2.12324	0.835816	1.58918	0.370313	40.9528	-1.13323	0.374662	0.758566
Zbtb16_3	-3.37116	1.86452	1.02915	0.345561	81.4755	-1.1419	0.719442	0.422457
Tbx21	-3.82044	1.50241	1.36073	0.381067	177.892	-1.15439	0.600549	0.553837
Zfp683	-2.47462	1.26929	1.5453	0.361197	55.6965	-1.15252	0.514801	0.637717
