# Supplementary material for: Reprogramming and redifferentiation of mucosal-associated invariant T cells reveal tumor inhibitory activity
Source: eLife. 2022 Apr 5;11:e70848. doi: 10.7554/eLife.70848 (PMC8983048; doi:10.7554/eLife.70848)
Supplement: Figure 2—figure supplement 3—source data 1. — The numbers in the left columns show the expression level of the gene as defined log (FPKM), and those in the right columns indicate the scaled expression level. p-Value was calculated with TTC. The ratio between groups exhibiting the most different expression level among the three cell types is shown. [file elife-70848-fig2-figsupp3-data1.xlsx]

## Sheet: Spleen
	L7_W.O_5OPRU	L7_Ly5.2_Sp	L7_Ly5.1_Sp	p.value	ratio	scale_L7_W.O_5OPRU	scale_L7_Ly5.2_Sp	scale_L7_Ly5.1_Sp
Hbegf	-4.6759	-0.0511578	0.252087	0.59332	138.101	-1.15296	0.52158	0.631379
Csf2	-2.79238	-2.12612	-1.20487	1	4.89156	-0.942417	-0.106622	1.04904
Cxcl10	-2.65659	-0.599346	-0.559459	0.59332	8.14278	-1.15454	0.560643	0.593898
Tnf	-3.13858	0.400398	0.641111	0.481494	43.8024	-1.15283	0.51954	0.633291
Pdgfb	-2.72277	1.25612	1.32888	0.316871	57.4923	-1.15456	0.561587	0.592971
Tgfb1_1	-0.538214	-0.157139	0.0494472	1	1.79977	-1.08317	0.195102	0.888071
Furin_1	-1.67785	-1.27733	-1.20469	1	1.60505	-1.14291	0.428931	0.713981
Furin_2	-1.23227	-1.20433	-0.875585	1	1.42859	-0.646357	-0.505475	1.15183
Fgf10	-3.80294	0.509054	0.503019	0.447178	74.1401	-1.1547	0.578563	0.576137
Adm	-0.559609	0.521797	1.69509	0.726731	9.53245	-0.986142	-0.0271624	1.0133
Adrb2	-0.717695	0.775019	0.898895	0.447178	5.03589	-1.15196	0.507139	0.644822
Agt	0.345073	0.358099	0.353854	1	1.00882	-1.09417	0.866609	0.22756
Ankrd1	0.184957	0.191939	0.189664	1	1.00472	-1.09417	0.866609	0.22756
Hsp90aa1_1	-2.79825	0.134229	0.291964	0.59332	21.9818	-1.15351	0.531441	0.622073
Hsp90aa1_2	-1.15127	-0.408091	-0.311044	0.59332	2.31688	-1.14825	0.468559	0.679689
Ltf	0.13229	0.137283	0.135656	1	1.00337	-1.09417	0.866609	0.22756
Hmgb1	0.943116	-0.409467	-0.259348	0.819014	0.300453	1.14877	-0.675625	-0.473142
F13a1	3.53594	0.944162	-0.736501	0.0631217	0.0139477	1.06306	-0.141104	-0.921954

## Sheet: Liver
	L7_W.O_5OPRU	L7_Ly5.2_Liv	L7_Ly5.1_Liv	p.value	ratio	scale_L7_W.O_5OPRU	scale_L7_Ly5.2_Liv	scale_L7_Ly5.1_Liv
Hbegf	-4.6759	-0.574386	2.28047	0.192395	1049.82	-1.05411	0.118839	0.93527
Csf2	-2.79238	0.619048	1.53558	0.350358	75.7896	-1.13115	0.364641	0.766509
Cxcl10	-2.65659	1.94236	1.65674	0.296845	74.6885	-1.15293	0.631887	0.521038
Tnf	-3.13858	0.286091	1.47969	0.36788	101.319	-1.11835	0.310223	0.808123
Pdgfb	-2.72277	0.73574	2.61281	0.178767	207.593	-1.08306	0.194766	0.888289
Tgfb1_1	-0.538214	0.103553	0.222911	1	2.14068	-1.14236	0.425393	0.71697
Furin_1	-1.67785	-0.539085	0.763135	0.513994	11.4844	-0.97695	-0.0446076	1.02156
Furin_2	-1.23227	-1.12082	0.0420297	0.480509	3.57621	-0.654513	-0.496582	1.15109
Fgf10	-3.80294	0.509846	0.507362	0.482475	74.4628	-1.1547	0.577849	0.576851
Adm	-0.559609	-0.446077	1.28198	0.75659	6.30658	-0.631481	-0.521472	1.15295
Adrb2	-0.717695	1.1668	1.12553	0.409265	6.31691	-1.15449	0.596413	0.558076
Agt	0.345073	0.358657	0.356909	1	1.01191	-1.1466	0.691556	0.455042
Ankrd1	0.184957	0.192238	0.191301	1	1.00636	-1.1466	0.691556	0.455042
Hsp90aa1_1	-2.79825	1.30649	1.7891	0.320907	98.2341	-1.1494	0.478972	0.670426
Hsp90aa1_2	-1.15127	0.635433	0.554426	0.482475	5.50519	-1.15377	0.617028	0.536742
Ltf	0.13229	0.137497	0.136827	1	1.00455	-1.1466	0.691556	0.455042
Hmgb1	0.943116	-0.381548	-0.486231	0.844134	0.239465	1.15221	-0.510408	-0.641798
F13a1	3.53594	0.945632	0.941023	0.371295	0.0746521	1.1547	-0.57581	-0.578889

## Sheet: LPL
	L7_W.O_5OPRU	L7_Ly5.2_LPL	L7_Ly5.1_LPL	p.value	ratio	scale_L7_W.O_5OPRU	scale_L7_Ly5.2_LPL	scale_L7_Ly5.1_LPL
Hbegf	-4.6759	1.28563	3.3631	0.140925	3099.5	-1.11836	0.310257	0.808098
Csf2	-2.79238	1.34124	2.52735	0.239805	204.329	-1.12836	0.351818	0.776544
Cxcl10	-2.65659	2.0523	2.64988	0.238881	201.638	-1.14858	0.471494	0.677089
Tnf	-3.13858	-0.0197948	0.929132	0.447927	58.423	-1.12564	0.339869	0.785767
Pdgfb	-2.72277	0.140756	0.193695	0.625873	18.4758	-1.15456	0.561416	0.59314
Tgfb1_1	-0.538214	-0.106442	-0.0394902	1	1.64662	-1.14584	0.449249	0.696588
Furin_1	-1.67785	0.170741	1.16678	0.447927	17.1953	-1.0838	0.196878	0.886918
Furin_2	-1.23227	0.45408	1.3855	0.407744	13.7052	-1.08124	0.189648	0.891596
Fgf10	-3.80294	0.509258	0.508301	0.49796	74.5328	-1.1547	0.577542	0.577158
Adm	-0.559609	-0.580968	0.567393	0.942639	3.08639	-0.561018	-0.59353	1.15455
Adrb2	-0.717695	0.391257	1.43116	0.387177	8.57504	-1.01054	0.0214178	0.989119
Agt	0.345073	0.358243	0.35757	1	1.01258	-1.15351	0.62213	0.531381
Ankrd1	0.184957	0.192016	0.191655	1	1.00672	-1.15351	0.62213	0.531381
Hsp90aa1_1	-2.79825	1.46985	0.627063	0.407744	30.7324	-1.13446	0.753644	0.380816
Hsp90aa1_2	-1.15127	0.899518	0.842028	0.49796	7.33966	-1.15435	0.60179	0.55256
Ltf	0.13229	0.137339	0.137081	1	1.0048	-1.15351	0.62213	0.531381
Hmgb1	0.943116	-0.0138526	-0.471387	0.854152	0.243046	1.09517	-0.230644	-0.864526
F13a1	3.53594	-0.223271	-1.29668	0.0785222	0.00796566	1.12858	-0.352794	-0.775786
