# Supplementary material for: Reprogramming and redifferentiation of mucosal-associated invariant T cells reveal tumor inhibitory activity
Source: eLife. 2022 Apr 5;11:e70848. doi: 10.7554/eLife.70848 (PMC8983048; doi:10.7554/eLife.70848)
Supplement: Figure 2—figure supplement 4—source data 1. — The numbers in the left columns show the expression level of the gene as defined log (FPKM), and those in the right columns indicate the scaled expression level. p-Value was calculated with TTC. The ratio between groups exhibiting the most different expression level among the three cell types is shown. [file elife-70848-fig2-figsupp4-data1.xlsx]

## Sheet: Spleen
	L7_W.O_5OPRU	L7_Ly5.2_Sp	L7_Ly5.1_Sp	p.value	ratio	scale_L7_W.O_5OPRU	scale_L7_Ly5.2_Sp	scale_L7_Ly5.1_Sp
Stk17b	-1.29061	0.0185821	0.123528	0.59332	4.11294	-1.15214	0.509471	0.642666
Isg20	-1.64639	-0.282222	0.149106	0.59332	6.02244	-1.12372	0.331759	0.791957
Cish	-2.66749	-2.43494	-0.912652	1	5.78253	-0.695032	-0.451044	1.14608
Plk3	-2.05453	-0.317306	-0.166152	0.59332	6.60862	-1.1517	0.503828	0.647874
Odc1	-2.28479	-0.594896	-0.140763	0.59332	8.53374	-1.13114	0.364592	0.766547
Chd7	-0.978385	0.270778	0.52815	0.481494	4.51107	-1.13988	0.41025	0.729632
Prdx6	-1.04084	-0.563945	-0.492851	0.59332	1.72977	-1.14646	0.453936	0.692519
Dgat1_1	-1.8669	-1.90729	-1.22078	1	1.90811	-0.524128	-0.628984	1.15311
Zfp36l1	-1.78406	-0.542049	-0.0926854	0.59332	5.42695	-1.11608	0.301584	0.814498
Hsp90aa1_1	-2.79825	0.134229	0.291964	0.59332	21.9818	-1.15351	0.531441	0.622073
Hsp90aa1_2	-1.15127	-0.408091	-0.311044	0.59332	2.31688	-1.14825	0.468559	0.679689
Cpd	-2.34882	-0.778793	-0.577434	0.458825	5.87901	-1.14846	0.470419	0.678043
Coq10b_1	26.3408	30.4619	30.0732	0.167906	41.781	-1.15048	0.660657	0.489823
Coq10b_2	-1.67895	-0.466216	-0.323246	0.59332	3.87948	-1.14937	0.478717	0.670654
Tgif1	-1.28325	-0.904669	-0.735085	1	1.73008	-1.10074	0.248237	0.8525
Fos	-5.9071	1.57512	1.55916	0.280794	1748.06	-1.1547	0.579198	0.5755
Bhlhe40	-5.88918	-0.401046	0.281956	0.59332	478.727	-1.1488	0.473456	0.675347
Ptp4a1	-1.45519	-0.292034	-0.249082	0.59332	3.34045	-1.15413	0.545681	0.608451
Zfand5_2	-0.21102	0.402912	0.295896	1	1.66016	-1.13923	0.732769	0.406459
Ppp1r15a	-2.91776	0.832667	1.03715	0.39435	52.1907	-1.15348	0.530825	0.622658
Gadd45b	-4.68322	-0.074811	0.316727	0.59332	148.406	-1.15184	0.505512	0.646323
Fosl2	-3.55436	-1.63614	-1.17414	1	10.8073	-1.1352	0.384584	0.750614
Per1	-2.84322	-0.670523	-0.447554	0.59332	10.9755	-1.1506	0.491062	0.659534
Ccl4	-3.13271	1.08675	1.14479	0.367878	72.0606	-1.15462	0.565479	0.58914
Rgs1	-3.55578	-0.652121	-0.251093	0.59332	27.2401	-1.14754	0.462582	0.684958
Nr4a2_1	-4.25742	1.4025	-0.375493	0.324179	48.5176	-1.09889	0.856586	0.2423
Tnf	-3.13858	0.400398	0.641111	0.481494	43.8024	-1.15283	0.51954	0.633291
Sik1	-2.93824	0.104617	0.195559	0.59332	22.9609	-1.15433	0.551669	0.602656
Nr4a3_1	-3.75528	-1.7575	-1.61069	1	8.53854	-1.15253	0.514994	0.637537
Nr4a3_2	-4.69397	-0.518805	0.274976	0.59332	143.875	-1.14187	0.422248	0.719617
Atf3	-5.41535	-0.460786	-0.163753	0.59332	190.87	-1.15324	0.526274	0.626963
Egr1	-2.49801	1.34962	1.50734	0.29538	54.8912	-1.154	0.542235	0.611768
Xcl1	-3.99764	1.51951	0.541928	0.305183	93.6499	-1.13867	0.735367	0.403307
Rgs16	-2.15117	-0.51821	-0.0343926	0.59332	8.30436	-1.1269	0.34535	0.781552
Trib1	-2.03131	0.0221991	-0.376437	0.59332	5.23244	-1.13519	0.750638	0.384553
Cd244a	-2.0919	1.15937	0.288875	0.390874	10.8133	-1.11542	0.816313	0.29911
Abcb1a_1	-3.04523	-0.271969	1.49591	0.324179	93.7975	-1.06513	0.146404	0.918728
Abcb1a_2	-0.224264	-0.232729	0.00492	1	1.25757	-0.545671	-0.608461	1.15413
Dennd4a_1	-2.34462	-0.808735	-0.538499	0.458825	6.08676	-1.14354	0.433069	0.710471
Dennd4a_2	-3.61407	0.730093	1.08789	0.39435	110.163	-1.152	0.507654	0.644346
Spty2d1	-1.25551	-0.0543754	-0.0819582	0.59332	3.23345	-1.15447	0.597348	0.557119
Irf4	-2.46645	-0.28199	0.712566	0.481494	24.023	-1.09939	0.243902	0.855486
Bag3	-3.27828	-0.663878	-0.495628	0.59332	16.1618	-1.15302	0.522593	0.630427
Dnaja4	-3.94863	-0.759347	0.288516	0.458825	69.2099	-1.12169	0.32344	0.798249
Btg3	-0.793316	-0.382628	-0.315577	0.59332	1.61243	-1.14496	0.442861	0.702099
Nfkbie	-0.812757	-0.379832	0.168328	0.59332	2.66735	-0.958646	-0.0781258	1.03677
Mxd1	-0.937551	-0.29441	-0.393558	0.59332	1.72287	-1.14281	0.714571	0.428234
Adam19	-0.694421	0.665757	0.633613	0.447178	3.77362	-1.15445	0.597933	0.55652
Isy1_1	-0.831343	-0.446377	-0.499651	0.59332	1.39332	-1.14525	0.700325	0.444922
Isy1_2	-0.655331	0.652126	0.54312	0.936989	3.31498	-1.15144	0.650849	0.500588
Itga1	-0.955207	0.108009	0.673393	0.481494	5.09673	-1.08512	0.200686	0.884438
Fgl2	-5.37577	-1.51751	0.302115	0.458825	292.332	-1.09637	0.234383	0.861991
Ly6g5b	-1.78012	-1.75035	0.294809	0.458825	7.96401	-0.58982	-0.56479	1.15461
Kdm6b	-0.613219	-0.30166	-0.242075	1	1.44939	-1.14173	0.421392	0.720337
Gzmb_1	-4.88619	-0.065301	-0.31898	0.59332	96.275	-1.15344	0.62347	0.529968
Gzmb_2	-4.37223	0.125432	-0.816294	0.458825	35.0207	-1.13172	0.764364	0.367359
Tnfrsf9	-4.5287	0.720937	-0.00679199	0.481494	92.0112	-1.14521	0.700539	0.444673
Nr4a1_1	-4.11376	0.0629314	-0.413361	0.59332	40.4635	-1.14842	0.678369	0.47005
Rbpj_1	0.803075	-1.04773	-0.748866	0.28568	0.211837	1.14157	-0.721181	-0.420385
Ube2s	0.920195	-0.543822	-0.536307	0.819014	0.23305	1.15469	-0.581801	-0.572888
Ssbp2	1.94561	-0.412941	-0.369925	0.505055	0.0987132	1.15455	-0.593215	-0.561339
Adgrg1	1.96422	-2.6166	-0.745343	0.0869279	0.0665657	1.05513	-0.933801	-0.121328

## Sheet: Liver
	L7_W.O_5OPRU	L7_Ly5.2_Liv	L7_Ly5.1_Liv	p.value	ratio	scale_L7_W.O_5OPRU	scale_L7_Ly5.2_Liv	scale_L7_Ly5.1_Liv
Stk17b	-1.29061	0.326034	0.0183487	0.61586	3.70232	-1.13601	0.747214	0.388793
Isg20	-1.64639	-0.357204	-0.105892	0.61586	4.6669	-1.14128	0.418598	0.722678
Cish	-2.66749	0.178916	1.32288	0.36788	54.0749	-1.10906	0.276171	0.832892
Plk3	-2.05453	0.222646	0.988355	0.430525	20.9656	-1.12041	0.318316	0.802094
Odc1	-2.28479	-0.811131	0.348764	0.480509	13.9232	-1.03726	0.0792403	0.958022
Chd7	-0.978385	0.509225	0.848736	0.482475	6.21596	-1.13695	0.393796	0.743152
Prdx6	-1.04084	-0.267815	0.142839	0.61586	3.26637	-1.08523	0.200978	0.884247
Dgat1_1	-1.8669	-0.258912	1.13425	0.430525	20.1086	-1.02299	0.0476793	0.975307
Zfp36l1	-1.78406	-0.0224573	0.387151	0.61586	8.76892	-1.13636	0.390649	0.745709
Hsp90aa1_1	-2.79825	1.30649	1.7891	0.320907	98.2341	-1.1494	0.478972	0.670426
Hsp90aa1_2	-1.15127	0.635433	0.554426	0.482475	5.50519	-1.15377	0.617028	0.536742
Cpd	-2.34882	0.63142	0.774149	0.482475	22.7138	-1.15375	0.536405	0.61735
Coq10b_1	26.3408	31.3639	32.1536	0.103171	334.582	-1.14561	0.447566	0.698043
Coq10b_2	-1.67895	0.886363	0.647528	0.482475	10.2418	-1.15059	0.659561	0.491033
Tgif1	-1.28325	-0.0555209	0.0652075	0.61586	3.85149	-1.15092	0.494554	0.656361
Fos	-5.9071	0.718117	1.85038	0.317869	2339	-1.14411	0.436953	0.707161
Bhlhe40	-5.88918	1.53359	1.33592	0.34101	1373.47	-1.15439	0.600559	0.553826
Ptp4a1	-1.45519	0.0741091	0.0815056	0.61586	4.64919	-1.15469	0.573167	0.581524
Zfand5_2	-0.21102	1.56363	0.864867	0.765332	2.93259	-1.06287	0.922248	0.140618
Ppp1r15a	-2.91776	0.998033	1.78805	0.32499	110.588	-1.14043	0.413463	0.726964
Gadd45b	-4.68322	0.455088	1.35009	0.388883	417.095	-1.14374	0.434426	0.709316
Fosl2	-3.55436	0.494598	0.913388	0.482475	87.1605	-1.15054	0.490405	0.66013
Per1	-2.84322	1.07012	1.16108	0.409265	54.8333	-1.15447	0.557341	0.597131
Ccl4	-3.13271	3.07794	1.86015	0.165315	147.358	-1.13476	0.752401	0.382364
Rgs1	-3.55578	0.482228	0.515847	0.482475	58.6525	-1.15467	0.570155	0.584516
Nr4a2_1	-4.25742	1.42716	0.760946	0.388883	151.164	-1.14805	0.681215	0.466832
Tnf	-3.13858	0.286091	1.47969	0.36788	101.319	-1.11835	0.310223	0.808123
Sik1	-2.93824	0.167124	0.57285	0.513994	33.4846	-1.14824	0.468504	0.679738
Nr4a3_1	-3.75528	0.475273	-0.00731115	0.513994	42.4347	-1.14842	0.678401	0.470014
Nr4a3_2	-4.69397	1.74889	1.78029	0.300812	648.235	-1.15469	0.573135	0.581555
Atf3	-5.41535	1.16072	2.62619	0.197451	3107.37	-1.13768	0.397753	0.739923
Egr1	-2.49801	0.712667	1.36359	0.388883	47.5413	-1.1403	0.412724	0.727578
Xcl1	-3.99764	1.40787	1.46766	0.361418	236.345	-1.15465	0.567799	0.586849
Rgs16	-2.15117	0.366529	1.18054	0.430525	27.9864	-1.12255	0.326951	0.795601
Trib1	-2.03131	0.768005	0.156488	0.513994	8.9156	-1.12951	0.772503	0.357005
Cd244a	-2.0919	3.0684	1.17359	0.140092	26.1929	-1.07596	0.900928	0.175034
Abcb1a_1	-3.04523	0.357586	2.43547	0.177994	240.014	-1.07021	0.159616	0.910592
Abcb1a_2	-0.224264	0.65823	1.16214	0.892326	4.00042	-1.07771	0.179827	0.897885
Dennd4a_1	-2.34462	1.00169	0.992001	0.409265	28.1238	-1.1547	0.579859	0.574838
Dennd4a_2	-3.61407	1.41855	1.2771	0.361418	133.11	-1.15435	0.601856	0.552493
Spty2d1	-1.25551	0.569162	0.531066	0.482475	5.96897	-1.15451	0.595523	0.558985
Irf4	-2.46645	-0.647894	0.60761	0.513994	21.6295	-1.05517	0.121431	0.93374
Bag3	-3.27828	1.07082	1.89746	0.301798	176.927	-1.14187	0.422285	0.719587
Dnaja4	-3.94863	0.310092	1.79901	0.283108	313.448	-1.11816	0.309513	0.80865
Btg3	-0.793316	0.582966	0.0201601	0.513994	2.25574	-1.0549	0.934138	0.120758
Nfkbie	-0.812757	-0.546088	-0.191827	0.61586	1.86066	-0.949834	-0.0937327	1.04357
Mxd1	-0.937551	0.59453	0.755359	0.482475	5.43527	-1.15042	0.489152	0.661265
Adam19	-0.694421	1.0768	1.41765	0.379644	8.26532	-1.14158	0.420493	0.721091
Isy1_1	-0.831343	-0.536176	-0.417202	0.61586	1.51307	-1.10885	0.27544	0.833413
Isy1_2	-0.655331	0.886537	-0.0907688	0.938678	1.75868	-0.900084	1.07645	-0.176366
Itga1	-0.955207	1.58636	1.74508	0.311903	14.8839	-1.15312	0.524185	0.628931
Fgl2	-5.37577	0.455905	1.39954	0.388883	875.954	-1.14512	0.44399	0.701127
Ly6g5b	-1.78012	-1.46388	1.63932	0.155713	30.5525	-0.659007	-0.491643	1.15065
Kdm6b	-0.613219	0.201072	0.843429	0.938678	4.29155	-1.03694	0.0785071	0.958433
Gzmb_1	-4.88619	3.43464	3.2844	0.139495	3535.41	-1.15456	0.593056	0.561501
Gzmb_2	-4.37223	3.4333	2.75712	0.147194	1248.07	-1.15117	0.653761	0.497405
Tnfrsf9	-4.5287	-0.564613	-0.656241	0.61586	48.0605	-1.15446	0.597479	0.556984
Nr4a1_1	-4.11376	1.02262	1.33609	0.379644	232.724	-1.15318	0.525371	0.627814
Rbpj_1	0.803075	0.458046	-0.753234	0.482475	0.210913	0.77541	0.353277	-1.12869
Ube2s	0.920195	-0.15216	0.0673816	0.844134	0.426214	1.13281	-0.760182	-0.372632
Ssbp2	1.94561	-1.16941	-0.935353	0.116034	0.0560806	1.15207	-0.643494	-0.508576
Adgrg1	1.96422	0.220524	-3.12523	0.253467	0.0061614	0.880648	0.206471	-1.08712

## Sheet: LPL
	L7_W.O_5OPRU	L7_Ly5.2_LPL	L7_Ly5.1_LPL	p.value	ratio	scale_L7_W.O_5OPRU	scale_L7_Ly5.2_LPL	scale_L7_Ly5.1_LPL
Stk17b	-1.29061	0.734248	0.397688	0.528261	5.41027	-1.14073	0.725457	0.415271
Isg20	-1.64639	0.237411	1.51412	0.3406	23.5825	-1.05755	0.127278	0.930268
Cish	-2.66749	0.189236	1.23509	0.447927	49.5303	-1.11534	0.298809	0.816533
Plk3	-2.05453	0.989941	0.823541	0.451215	17.7799	-1.15334	0.625274	0.528062
Odc1	-2.28479	0.00864486	1.5649	0.3406	46.9785	-1.05739	0.126888	0.9305
Chd7	-0.978385	-0.0261602	0.479582	0.528261	4.29721	-1.08525	0.20104	0.884207
Prdx6	-1.04084	0.403639	0.604843	0.528261	5.18455	-1.14743	0.461648	0.685779
Dgat1_1	-1.8669	2.00247	2.62138	0.239514	88.9683	-1.14532	0.445437	0.699881
Zfp36l1	-1.78406	0.5494	0.776524	0.49796	12.9434	-1.15099	0.495371	0.655617
Hsp90aa1_1	-2.79825	1.46985	0.627063	0.407744	30.7324	-1.13446	0.753644	0.380816
Hsp90aa1_2	-1.15127	0.899518	0.842028	0.49796	7.33966	-1.15435	0.60179	0.55256
Cpd	-2.34882	0.872286	1.23814	0.451215	36.1242	-1.14973	0.482188	0.667543
Coq10b_1	26.3408	31.8558	31.285	0.144916	140.366	-1.14958	0.668887	0.48069
Coq10b_2	-1.67895	1.20049	1.10143	0.42744	16.1251	-1.15417	0.607386	0.546785
Tgif1	-1.28325	0.00347266	0.780993	0.528261	7.87934	-1.07141	0.162809	0.908605
Fos	-5.9071	1.26917	1.57034	0.361197	1767.7	-1.15397	0.54141	0.612559
Bhlhe40	-5.88918	0.849074	1.87743	0.311551	2360.44	-1.14609	0.451164	0.694928
Ptp4a1	-1.45519	1.2769	1.04398	0.398773	12.1723	-1.15128	0.652532	0.49875
Zfand5_2	-0.21102	0.438804	0.58391	0.949559	2.21429	-1.13762	0.397421	0.740194
Ppp1r15a	-2.91776	0.858775	1.09869	0.451215	55.5036	-1.15306	0.523283	0.629779
Gadd45b	-4.68322	0.857002	1.8114	0.338553	661.576	-1.14396	0.435901	0.708059
Fosl2	-3.55436	1.36204	1.37278	0.381067	137.985	-1.1547	0.575459	0.579239
Per1	-2.84322	1.30777	1.26258	0.381067	60.6911	-1.15465	0.586804	0.567844
Ccl4	-3.13271	1.84234	0.691975	0.338553	45.8185	-1.12619	0.783933	0.342259
Rgs1	-3.55578	1.43075	0.751362	0.407744	74.2283	-1.14555	0.698391	0.447164
Nr4a2_1	-4.25742	1.61382	0.210638	0.3406	87.1872	-1.12406	0.790858	0.333206
Tnf	-3.13858	-0.0197948	0.929132	0.447927	58.423	-1.12564	0.339869	0.785767
Sik1	-2.93824	1.03286	1.10168	0.42744	56.8218	-1.15457	0.562408	0.592165
Nr4a3_1	-3.75528	1.59975	1.45139	0.361197	182.486	-1.15436	0.601501	0.552858
Nr4a3_2	-4.69397	1.77178	1.24426	0.345561	379.262	-1.15158	0.649252	0.502328
Atf3	-5.41535	1.2704	2.33158	0.275869	2314.44	-1.14545	0.446394	0.699055
Egr1	-2.49801	-0.343171	0.0165791	0.625873	12.3616	-1.14455	0.440007	0.704548
Xcl1	-3.99764	1.80427	-0.710309	0.147707	26.7712	-1.04132	0.952791	0.0885314
Rgs16	-2.15117	0.725403	0.953344	0.451215	22.2984	-1.15219	0.510231	0.641962
Trib1	-2.03131	0.972869	1.91253	0.322817	51.6167	-1.12427	0.334062	0.790205
Cd244a	-2.0919	3.4233	-0.0833374	0.0850671	7.45261	-0.898476	1.07737	-0.178898
Abcb1a_1	-3.04523	2.69473	2.27346	0.229374	204.114	-1.1522	0.641936	0.510259
Abcb1a_2	-0.224264	1.23777	1.27423	0.840672	4.47496	-1.15444	0.555892	0.598546
Dennd4a_1	-2.34462	1.72831	1.08949	0.345561	31.0036	-1.14236	0.716996	0.425363
Dennd4a_2	-3.61407	1.55217	0.803312	0.370313	82.8794	-1.14427	0.706253	0.438015
Spty2d1	-1.25551	0.650823	0.731628	0.49796	7.29461	-1.15396	0.541054	0.612901
Irf4	-2.46645	0.116579	1.41316	0.387177	48.4051	-1.09072	0.217118	0.873604
Bag3	-3.27828	1.25712	1.92044	0.323036	181.041	-1.14674	0.456156	0.690585
Dnaja4	-3.94863	2.1948	2.92872	0.208851	970.048	-1.14924	0.477453	0.671784
Btg3	-0.793316	1.23463	1.52146	0.370965	10.1227	-1.14722	0.459948	0.68727
Nfkbie	-0.812757	0.485554	1.09119	0.451215	6.71235	-1.09732	0.237359	0.859965
Mxd1	-0.937551	1.29715	1.37593	0.381067	10.1096	-1.15418	0.547103	0.607079
Adam19	-0.694421	0.795503	0.0978838	0.528261	2.20848	-1.0205	0.978158	0.0423384
Isy1_1	-0.831343	0.62983	0.901289	0.49796	5.65552	-1.14239	0.425548	0.71684
Isy1_2	-0.655331	0.22068	0.598781	0.942639	3.50473	-1.10372	0.25799	0.845726
Itga1	-0.955207	1.28012	0.815289	0.407744	5.87376	-1.13206	0.763077	0.368985
Fgl2	-5.37577	0.408422	1.4389	0.407744	911.122	-1.14328	0.431376	0.711909
Ly6g5b	-1.78012	-0.242078	1.56611	0.3406	28.3956	-0.972034	-0.0537622	1.0258
Kdm6b	-0.613219	0.0368068	0.265422	1	2.40763	-1.11781	0.308149	0.80966
Gzmb_1	-4.88619	1.26725	2.17392	0.290214	1164.57	-1.14663	0.455299	0.691332
Gzmb_2	-4.37223	2.39139	2.54156	0.237161	1006.05	-1.15449	0.558233	0.596258
Tnfrsf9	-4.5287	0.452916	-0.153451	0.528261	79.4598	-1.14749	0.685292	0.462203
Nr4a1_1	-4.11376	0.709467	1.35985	0.407744	238.32	-1.14785	0.465172	0.682679
Rbpj_1	0.803075	-0.332908	0.0426739	0.942639	0.467479	1.09222	-0.870587	-0.221637
Ube2s	0.920195	0.135746	0.136625	0.854152	0.456772	1.1547	-0.578321	-0.576379
Ssbp2	1.94561	0.28278	-1.08425	0.274564	0.0483222	1.03091	-0.0649824	-0.965924
Adgrg1	1.96422	0.82371	-1.70729	0.311551	0.0254379	0.853592	0.246655	-1.10025
