# Supplementary material for: Reprogramming and redifferentiation of mucosal-associated invariant T cells reveal tumor inhibitory activity
Source: eLife. 2022 Apr 5;11:e70848. doi: 10.7554/eLife.70848 (PMC8983048; doi:10.7554/eLife.70848)
Supplement: Figure 2—figure supplement 5—source data 1. — The numbers in the left columns show the expression level of the gene as defined log (FPKM), and those in the right columns indicate the scaled expression level. p-Value was calculated with TTC. The ratio between groups exhibiting the most different expression level among the three cell types is shown. [file elife-70848-fig2-figsupp5-data1.xlsx]

## Sheet: Spleen
	L7_W.O_5OPRU	L7_Ly5.2_Sp	L7_Ly5.1_Sp	p.value	ratio	scale_L7_W.O_5OPRU	scale_L7_Ly5.2_Sp	scale_L7_Ly5.1_Sp
Polm	-0.589816	0.934133	0.992422	0.849341	4.86583	-1.15409	0.54456	0.609531
Rag1	4.85128	-1.32726	-1.82701	0.00259917	0.00125793	1.15209	-0.508873	-0.643219
Rag2	4.84387	-0.45464	-0.44925	0.0227828	0.00502604	1.1547	-0.578231	-0.576469
Hmgb1	0.943116	-0.409467	-0.259348	0.819014	0.300453	1.14877	-0.675625	-0.473142
Dntt	5.77388	-0.494221	-2.72201	0.00239777	0.000204306	1.11718	-0.305726	-0.811449
Lig4	3.17484	0.190475	-0.0936605	0.161042	0.0380633	1.15114	-0.497107	-0.654034
Polg	0.706026	0.158087	0.20083	0.928731	0.603387	1.15186	-0.646054	-0.505803
Xrcc4	0.903164	0.772134	0.720658	1	0.83318	1.11067	-0.28181	-0.828856
Nhej1_1	1.23537	0.711447	0.168367	0.874091	0.344037	0.993963	0.0119673	-1.00593
Dclre1c	1.34977	-0.327282	-0.054757	0.718554	0.245484	1.14139	-0.722105	-0.419282

## Sheet: Liver
	L7_W.O_5OPRU	L7_Ly5.2_Liv	L7_Ly5.1_Liv	p.value	ratio	scale_L7_W.O_5OPRU	scale_L7_Ly5.2_Liv	scale_L7_Ly5.1_Liv
Polm	-0.589816	0.481963	0.772709	0.945993	3.90605	-1.13076	0.362798	0.767961
Rag1	4.85128	-1.8708	-0.334552	0.0175442	0.00559528	1.12691	-0.78153	-0.345379
Rag2	4.84387	-0.455348	-3.81635	0.0176829	0.000173345	1.06574	-0.147974	-0.917768
Hmgb1	0.943116	-0.381548	-0.486231	0.844134	0.239465	1.15221	-0.510408	-0.641798
Dntt	5.77388	-3.31326	-0.492578	0.00690334	0.00189894	1.10034	-0.853391	-0.246946
Lig4	3.17484	-1.71547	-0.230171	0.0896172	0.0332063	1.10288	-0.847651	-0.255229
Polg	0.706026	-0.360148	-0.0990167	0.938678	0.447069	1.12238	-0.796134	-0.326245
Xrcc4	0.903164	0.850928	0.313957	0.945993	0.554767	0.655577	0.495415	-1.15099
Nhej1_1	1.23537	0.971017	0.513034	0.978087	0.485615	0.899934	0.176603	-1.07654
Dclre1c	1.34977	0.0504545	0.17439	0.75659	0.308703	1.15038	-0.661609	-0.488771

## Sheet: LPL
	L7_W.O_5OPRU	L7_Ly5.2_LPL	L7_Ly5.1_LPL	p.value	ratio	scale_L7_W.O_5OPRU	scale_L7_Ly5.2_LPL	scale_L7_Ly5.1_LPL
Polm	-0.589816	-0.582688	0.48989	0.942639	2.94381	-0.583077	-0.571605	1.15468
Rag1	4.85128	-2.90306	-0.335171	0.0239069	0.00559182	1.092	-0.871036	-0.220967
Rag2	4.84387	-0.454823	-0.453968	0.0595967	0.00500238	1.1547	-0.57749	-0.577211
Hmgb1	0.943116	-0.0138526	-0.471387	0.854152	0.243046	1.09517	-0.230644	-0.864526
Dntt	5.77388	-0.494419	-0.49349	0.0254567	0.00189721	1.1547	-0.577479	-0.577222
Lig4	3.17484	0.405949	-0.0206546	0.315236	0.0409461	1.14594	-0.450025	-0.695915
Polg	0.706026	-0.242715	-0.29289	0.942639	0.368278	1.15355	-0.5322	-0.621352
Xrcc4	0.903164	0.027049	0.325707	0.942639	0.561324	1.08787	-0.87921	-0.208656
Nhej1_1	1.23537	-0.714925	-1.32012	0.251021	0.0776542	1.12467	-0.335745	-0.788923
Dclre1c	1.34977	-0.289405	-0.1462	0.771861	0.224032	1.1511	-0.654421	-0.496683
