# Supplementary material for: Reprogramming and redifferentiation of mucosal-associated invariant T cells reveal tumor inhibitory activity
Source: eLife. 2022 Apr 5;11:e70848. doi: 10.7554/eLife.70848 (PMC8983048; doi:10.7554/eLife.70848)
Supplement: Figure 3—figure supplement 1—source data 1. [file elife-70848-fig3-figsupp1-data1.xlsx]

## Sheet: Fig3_fig suppl source data
Sample	tissues	LLC	days post reMAIT	animal ID	Ly5.2+TCRb+MR1tet+
1: HW2021-12-23-1.0001.fcs	spleen	LLC	9 days	1	1618
2: HW2021-12-23-1.0002.fcs	spleen	LLC	9 days	2	939
3: HW2021-12-23-1.0003.fcs	spleen	LLC	9 days	3	153
4: HW2021-12-23-1.0004.fcs	spleen	LLC	9 days	4	209
5: HW2021-12-23-1.0005.fcs	spleen	none	9 days	5	887
6: HW2021-12-23-1.0006.fcs	spleen	none	9 days	6	557
7: HW2021-12-23-1.0007.fcs	spleen	none	9 days	7	204
8: HW2021-12-23-1.0008.fcs	spleen	none	9 days	8	359
9: HW2021-12-23-1.0009.fcs	lung	LLC	9 days	1	127
10: HW2021-12-23-1.0010.fcs	lung	LLC	9 days	2	71
11: HW2021-12-23-1.0011.fcs	lung	LLC	9 days	3	24
12: HW2021-12-23-1.0012.fcs	lung	LLC	9 days	4	32
13: HW2021-12-23-1.0013.fcs	lung	none	9 days	5	50
14: HW2021-12-23-1.0014.fcs	lung	none	9 days	6	137
15: HW2021-12-23-1.0015.fcs	lung	none	9 days	7	46
16: HW2021-12-23-1.0016.fcs	lung	none	9 days	8	48
17: HW2021-12-23-1.0017.fcs	skin	LLC	9 days	1	59
18: HW2021-12-23-1.0018.fcs	skin	LLC	9 days	2	16
19: HW2021-12-23-1.0019.fcs	skin	LLC	9 days	3	55
20: HW2021-12-23-1.0020.fcs	skin	LLC	9 days	4	45
21: HW2021-12-23-1.0021.fcs	skin	none	9 days	5	29
22: HW2021-12-23-1.0022.fcs	skin	none	9 days	6	30
23: HW2021-12-23-1.0023.fcs	skin	none	9 days	7	37
24: HW2021-12-23-1.0024.fcs	skin	none	9 days	8	20
25: HW2021-12-20-1.0001.fcs	spleen	none	6 days	1	1477
26: HW2021-12-20-1.0002.fcs	spleen	none	6 days	2	4934
27: HW2021-12-20-1.0003.fcs	spleen	none	6 days	3	1275
28: HW2021-12-20-1.0004.fcs	spleen	none	6 days	4	2503
29: HW2021-12-20-1.0005.fcs	lung	none	6 days	1	44
30: HW2021-12-20-1.0006.fcs	lung	none	6 days	2	179
31: HW2021-12-20-1.0007.fcs	lung	none	6 days	3	92
32: HW2021-12-20-1.0008.fcs	lung	none	6 days	4	71
33: HW2021-12-20-1.0009.fcs	skin	none	6 days	1	3
34: HW2021-12-20-1.0010.fcs	skin	none	6 days	2	3
35: HW2021-12-20-1.0011.fcs	skin	none	6 days	3	2
36: HW2021-12-20-1.0012.fcs	skin	none	6 days	4	2
