# Supplementary material for: Reprogramming and redifferentiation of mucosal-associated invariant T cells reveal tumor inhibitory activity
Source: eLife. 2022 Apr 5;11:e70848. doi: 10.7554/eLife.70848 (PMC8983048; doi:10.7554/eLife.70848)
Supplement: Figure 3—source data 1. — (A), m-reMAIT cell dose-dependent mouse survival (B). Effects of the multiple transfers of m-reMAIT cells on mouse survival (C). Effects of m-reMAIT cell dose on in situ tumor growth (D). [file elife-70848-fig3-data1.xlsx]

## Sheet: Fig3A source data
Sample	cell	incubation time	ligand	MR1 MFI
1: HW2018-06-20-1.010.fcs	B16	1h	-	137.7
2: HW2018-06-20-1.011.fcs	B16	1h	5-A-RU/MG	496.7						5-A-RU/MG		relative MFI
3: HW2018-06-20-1.019.fcs	B16	2h	5-A-RU/MG	777.1				B16	0	137.7		1
4: HW2018-06-20-1.031.fcs	B16	4h	5-A-RU/MG	874.2					1	496.7		3.60712
5: HW2018-06-20-1.030.fcs	B16	4h	-	187.9					2	777.1		5.64343
6: HW2018-06-20-1.039.fcs	B16	8h	5-A-RU/MG	656.5					4	874.2		6.34858
7: HW2018-06-21-1.010.fcs	B16	21h	-	169.7					8	573.4		4.16412
8: HW2018-06-21-1.011.fcs	B16	21h	5-A-RU/MG	242.2					21	242.2		1.7589
9: HW2018-06-20-1.002.fcs	EL4	1h	5-A-RU/MG	306.4
10: HW2018-06-20-1.001.fcs	EL4	1h	-	165
11: HW2018-06-20-1.013.fcs	EL4	2h	5-A-RU/MG	406.6				EL4	0	165		1
12: HW2018-06-20-1.021.fcs	EL4	4h	-	193.9					1	306.4		1.85697
13: HW2018-06-20-1.022.fcs	EL4	4h	5-A-RU/MG	409.6					2	406.6		2.46424
14: HW2018-06-20-1.033.fcs	EL4	8h	5-A-RU/MG	364.3					4	409.6		2.48242
15: HW2018-06-21-1.002.fcs	EL4	21h	5-A-RU/MG	146.9					8	364.3		2.20788
16: HW2018-06-21-1.001.fcs	EL4	21h	-	310.9					21	146.9		0.890303
17: HW2018-06-20-1.008.fcs	LLC	1h	5-A-RU/MG	185.8
18: HW2018-06-20-1.007.fcs	LLC	1h	-	176.3
19: HW2018-06-20-1.017.fcs	LLC	2h	5-A-RU/MG	215.3				LLC	0	176.3		1
20: HW2018-06-20-1.028.fcs	LLC	4h	5-A-RU/MG	200.2					1	185.8		1.05389
21: HW2018-06-20-1.027.fcs	LLC	4h	-	165					2	215.3		1.22121
22: HW2018-06-20-1.037.fcs	LLC	8h	5-A-RU/MG	203.2					4	200.2		1.13556
23: HW2018-06-21-1.008.fcs	LLC	21h	5-A-RU/MG	87.6					8	203.2		1.15258
24: HW2018-06-21-1.007.fcs	LLC	21h	-	55.8					21	87.6		0.49688
25: HW2018-06-20-1.005.fcs	RL-M	1h	5-A-RU/MG	479.6
26: HW2018-06-20-1.004.fcs	RL-M	1h	-	93.3
27: HW2018-06-20-1.015.fcs	RL-M	2h	5-A-RU/MG	588				RL-M	0	93.3		1
28: HW2018-06-20-1.024.fcs	RL-M	4h	-	80.6					1	479.6		5.14041
29: HW2018-06-20-1.025.fcs	RL-M	4h	5-A-RU/MG	544.9					2	588		6.30225
30: HW2018-06-20-1.035.fcs	RL-M	8h	5-A-RU/MG	468.8					4	544.9		5.8403
31: HW2018-06-21-1.005.fcs	RL-M	21h	5-A-RU/MG	142					8	468.8		5.02465
32: HW2018-06-21-1.004.fcs	RL-M	21h	-	76.5					21	142		1.52197
Sample					mean MFI
1: HW2021-03-31-2.0001.mqd	Yac-1		-	1.4	1.46667			Yac-1	0	1.46667		1
2: HW2021-03-31-2.0002.mqd	Yac-1		-	1.5					1	2.46667		1.68182
3: HW2021-03-31-2.0003.mqd	Yac-1		-	1.5					2	2.93333		2
7: HW2021-03-31-2.0007.mqd	Yac-1	1h	5-OP-RU	2.4	2.46667				4	2.8		1.90909
8: HW2021-03-31-2.0008.mqd	Yac-1		5-OP-RU	2.5					8	1.96667		1.34091
9: HW2021-03-31-2.0009.mqd	Yac-1		5-OP-RU	2.5					21	1.43333		0.977273
13: HW2021-03-31-2.0013.mqd	Yac-1	2h	5-OP-RU	3	2.93333
14: HW2021-03-31-2.0014.mqd	Yac-1		5-OP-RU	2.8
15: HW2021-03-31-2.0015.mqd	Yac-1		5-OP-RU	3
19: HW2021-03-31-2.0019.mqd	Yac-1	4h	5-OP-RU	2.8	2.8
20: HW2021-03-31-2.0020.mqd	Yac-1		5-OP-RU	2.8
21: HW2021-03-31-2.0021.mqd	Yac-1		5-OP-RU	2.8
25: HW2021-03-31-2.0025.mqd	Yac-1	8h	5-OP-RU	1.9	1.96667
26: HW2021-03-31-2.0026.mqd	Yac-1		5-OP-RU	2
27: HW2021-03-31-2.0027.mqd	Yac-1		5-OP-RU	2
31: HW2021-04-01-1.0004.mqd	Yac-1	21h	5-OP-RU	1.4	1.43333
32: HW2021-04-01-1.0005.mqd	Yac-1		5-OP-RU	1.4
33: HW2021-04-01-1.0006.mqd	Yac-1		5-OP-RU	1.5

## Sheet: Fig3B source data
			DOB		reMAIT injection		cancer injection			Sacrificed
5	1	♀	2019-06-03	B6 (Clea)	n.a.	n.a.	2019-08-14	LLC	3×10^5 (IV)	2019-08-06	-8
	2	♀	2019-06-03	B6 (Clea)						2019-09-04	21
	3	♀	2019-06-03	B6 (Clea)						2019-09-05	22
	4	♀	2019-06-03	B6 (Clea)						2019-09-10	27
	5	♀	2019-06-03	B6 (Clea)						2019-09-24	41
	6	♀	2019-06-03	B6 (Clea)						2019-09-05	22
	7	♀	2019-06-03	B6 (Clea)						2019-09-06	23
	8	♀	2019-06-03	B6 (Clea)						2019-09-10	27
	9	♀	2019-06-03	B6 (Clea)							-43691	2019/9/25 end
	10	♀	2019-06-03	B6 (Clea)							-43691	2019/9/25 end
6	1	♀	2019-06-03	B6 (Clea)	2019-08-06					2019-09-10	27
	2	♀	2019-06-03	B6 (Clea)						2019-09-17	34
	3	♀	2019-06-03	B6 (Clea)						2019-09-24	41
	4	♀	2019-06-03	B6 (Clea)		L7-1					-43691	2019/9/25 end
	5	♀	2019-06-03	B6 (Clea)		0.3 x E6					-43691	2019/9/25 end
	6	♀	2019-06-03	B6 (Clea)		(IP)				2019-09-11	28
	7	♀	2019-06-03	B6 (Clea)						2019-09-17	34
	8	♀	2019-06-03	B6 (Clea)							-43691	2019/9/25 end
	9	♀	2019-06-03	B6 (Clea)							-43691	2019/9/25 end
	10	♀	2019-06-03	B6 (Clea)							-43691	2019/9/25 end
7	1	♀	2019-06-03	B6 (Clea)	2019-08-06					2019-09-24	41
	2	♀	2019-06-03	B6 (Clea)							-43691	2019/9/25 end
	3	♀	2019-06-03	B6 (Clea)							-43691	2019/9/25 end
	4	♀	2019-06-03	B6 (Clea)		L7-1					-43691	2019/9/25 end
	5	♀	2019-06-03	B6 (Clea)		1.0 x E6					-43691	2019/9/25 end
	6	♀	2019-06-03	B6 (Clea)		(IP)				2019-09-18	35
	7	♀	2019-06-03	B6 (Clea)							-43691	2019/9/25 end
	8	♀	2019-06-03	B6 (Clea)							-43691	2019/9/25 end
	9	♀	2019-06-03	B6 (Clea)							-43691	2019/9/25 end
	10	♀	2019-06-03	B6 (Clea)							-43691	2019/9/25 end
8	1	♀	2019-06-03	B6 (Clea)	2019-08-06	L7-1 3.0 x E6 (IP)				2019-09-10	27
	2	♀	2019-06-03	B6 (Clea)						2019-09-24	41
	3	♀	2019-06-03	B6 (Clea)						2019-09-25	42
	4	♀	2019-06-03	B6 (Clea)						2019-09-26	43
	5	♀	2019-06-03	B6 (Clea)							-43691	2019/9/25 end
	6	♀	2019-06-03	B6 (Clea)						2019-09-24	41
	7	♀	2019-06-03	B6 (Clea)							-43691	2019/9/25 end
	8	♀	2019-06-03	B6 (Clea)							-43691	2019/9/25 end
	9	♀	2019-06-03	B6 (Clea)							-43691	2019/9/25 end
	10	♀	2019-06-03	B6 (Clea)							-43691	2019/9/25 end
42		0

## Sheet: Figu3C source data
					reMAIT (pre)		cancer			reMAIT (2nd)		reMAIT (3rd)		sacrificed	survival
					date	cell#	date	cell	cell#	date	cell#	date	cell#
group	ID	sex	DOB	genetype		route			route		route		route
4	1	♀	2019-04-15	B6 (Clea)	nd	nd	2019-06-26	LLC	3×10^5 (IV)	nd	nd	nd	nd	2019-07-27	31
	2	♀	2019-04-15	B6 (Clea)										2019-07-29	33
	3	♀	2019-04-15	B6 (Clea)										2019-07-30	34
	4	♀	2019-04-15	B6 (Clea)										2019-07-30	34
	5	♀	2019-04-15	B6 (Clea)										2019-07-24	28
	6	♀	2019-04-15	B6 (Clea)										2019-07-29	33
	7	♀	2019-04-15	B6 (Clea)										2019-07-26	30
	8	♀	2019-04-15	B6 (Clea)										2019-07-28	32
	9	♀	2019-04-15	B6 (Clea)										2019-07-25	29
	10	♀	2019-04-15	B6 (Clea)										2019-07-25	29
	11	♀	2019-04-15	B6 (Clea)										2019-07-16	20
5	1	♀	2019-04-15	B6 (Clea)	2019-06-18		2019-06-26	LLC	3×10^5 (IV)	nd	nd	nd	nd	2019-08-09	44
	2	♀	2019-04-15	B6 (Clea)										2019-08-06	41
	3	♀	2019-04-15	B6 (Clea)											-43642	2019/8/15 end
	4	♀	2019-04-15	B6 (Clea)		L7-1								2019-08-07	42
	5	♀	2019-04-15	B6 (Clea)		1.0 x E6								2019-07-24	28
	6	♀	2019-04-15	B6 (Clea)		(IP)								2019-08-06	41
	7	♀	2019-04-15	B6 (Clea)										2019-07-24	28
	8	♀	2019-04-15	B6 (Clea)											-43642	2019/8/15 end
	9	♀	2019-04-15	B6 (Clea)											-43642	2019/8/15 end
	10	♀	2019-04-15	B6 (Clea)											-43642	2019/8/15 end
6	1	♀	2019-04-15	B6 (Clea)	2019-06-18		2019-06-26	LLC	3×10^5 (IV)	2019-07-02		2019-07-09			-43642	2019/8/15 end
	2	♀	2019-04-15	B6 (Clea)											-43642	2019/8/15 end
	3	♀	2019-04-15	B6 (Clea)											-43642	2019/8/15 end
	4	♀	2019-04-15	B6 (Clea)		L7-1					L7-1		L7-1	-	#VALUE!
	5	♀	2019-04-15	B6 (Clea)		1.0 x E6					1.0 x E6		1.0 x E6		-43642	2019/8/15 end
	6	♀	2019-04-15	B6 (Clea)		(IP)					(IP)		(IP)	2019-07-21	25
	7	♀	2019-04-15	B6 (Clea)										2019-08-13	48
	8	♀	2019-04-15	B6 (Clea)										2019-08-06	41
	9	♀	2019-04-15	B6 (Clea)											-43642	2019/8/15 end
	10	♀	2019-04-15	B6 (Clea)										2019-08-12	47

## Sheet: Fig3D source data
days	sham										0.3x106									1x106										3x106
6	2.5	25.1	3.4	5	23.3	5.3	8.8	12	31.9	1.9	15.9	0	8.7	0	15.7	44.1	5.3	4.5	7.8	45.6	6	13.1	12.2	18.4	14.9	11.3	66.3	16.4	23.3	20	22.3	9.7	31.8	21.8	29.9	45.6	28.9	18.1	14.9	102.6
9	87.6	178.9	46	29.4	132.1	66.8	56.7	25.4	318	56.4	15.7	54.5	76.2	61.4	52.8	44	55.2	73.6	51	102.7	83.9	24.6	51.9	57.1	73.8	40.8	328.1	49.6	33.1	43.1	22	40.8	18.3	45.2	54.2	38.8	42.6	29.8	28.3	120.9
12	228.7	566.6	212.7	202.2	326.1	342.9	142.2	125	423.2	63.6	78.7	93.3	193.8	388.1	242.8	226.8	177.3	216.6	184	296.4	268.6	78.7	112.7	191.6	124.2	214.2	352.5	122.5	122.3	124	182.3	185.1	66.3	220	200	148.1	97.5	88.8	97.5	343.3
15	688.6	1003.5	525.8	665.3	369.8	752.6	586.6	296.2	457.9	268.6	211.7	280.1	878	529.9	575.1	577.6	327.2	650	667.5	647.5	764	172.8	325.4	392.9	285.8	571.1	535	484	254.1	393.8	517.5	686.8	275.2	810	541	227.3	556.7	357.6	254.6	433.9
17	1083.2	1526.3	938.5	1687.5	786.5	2278	953.3	639.8	1107	702.3	701	1335.3	1785.2	828.1	1359.4	1108.8	715	1709.9	1214.5	1342	1301.3	356.4	678	930.4	1131.2	1107	1342.8	1102	790	842.7	1171.9	2130.2	629.4	1322.8	1105.4	595.5	1116	832.4	730	1190.7
