# Supplementary material for: Reprogramming and redifferentiation of mucosal-associated invariant T cells reveal tumor inhibitory activity
Source: eLife. 2022 Apr 5;11:e70848. doi: 10.7554/eLife.70848 (PMC8983048; doi:10.7554/eLife.70848)
Supplement: Figure 4—source data 1. — Activation of m-reMAIT cells by NK cells (A). Cytokines and chemokines produced upon a coculture (B). Transcripts relevant to cytolytic activity in m-reMAIT cells (C). Transcripts relevant to cytolytic activity in NK cells (D). Activation and degranulation of NK cells and m-reMAIT cells (E). Cytolytic activity against Yac-1 (F). Cytolytic activity against LLC (G). NK cell-dependent extension of survival (H). [file elife-70848-fig4-data1.xlsx]

## Sheet: Fig4A source data
Sample	NK:reMAIT	Lymp/NK1.1+/NK/CD69+,Freq. of Parent	Lymp/reMAIT/CD69+,Freq. of Parent
1: HW2021-01-23.0002.mqd	3:1 (1.5x10^5:0.5x10^5)	15.7	55.3
2: HW2021-01-23.0003.mqd	1:1 (0.5x10^5:0.5x10^5)	9.5	41.1
3: HW2021-01-23.0004.mqd	0.3:1 (1.5x10^4:0.5x10^5)	8.1	23.7
4: HW2021-01-23.0005.mqd	reMAIT	16	4.8
5: HW2021-01-23.0006.mqd	0.3:1 (0.5x10^5:1.5x10^5)	8.2	38.4
6: HW2021-01-23.0007.mqd	1:1 (0.5x10^5:0.5x10^5)	8.1	38.9
7: HW2021-01-23.0008.mqd	3:1 (0.5x10^5:1.5x10^4)	10.9	42.4
8: HW2021-01-23.0009.mqd	NK	22.4	45.7
9: HW2021-01-23.0010.mqd	3:1 (1.5x10^5:0.5x10^5)	9.5	42.7
10: HW2021-01-23.0011.mqd	1:1 (0.5x10^5:0.5x10^5)	7.7	39
11: HW2021-01-23.0012.mqd	0.3:1 (1.5x10^4:0.5x10^5)	7.4	21.5
12: HW2021-01-23.0013.mqd	reMAIT	12.5	3
13: HW2021-01-23.0014.mqd	0.3:1 (0.5x10^5:1.5x10^5)	6.4	27.2
14: HW2021-01-23.0015.mqd	1:1 (0.5x10^5:0.5x10^5)	7.1	39.4
15: HW2021-01-23.0016.mqd	3:1 (0.5x10^5:1.5x10^4)	13	45.3
16: HW2021-01-23.0017.mqd	NK	10.8	35
17: HW2021-01-23.0018.mqd	3:1 (1.5x10^5:0.5x10^5)	10.5	48.6
18: HW2021-01-23.0019.mqd	1:1 (0.5x10^5:0.5x10^5)	10.1	37.6
19: HW2021-01-23.0020.mqd	0.3:1 (1.5x10^4:0.5x10^5)	6.6	21.2
20: HW2021-01-23.0021.mqd	reMAIT	5	3.2
21: HW2021-01-23.0022.mqd	0.3:1 (0.5x10^5:1.5x10^5)	7.5	29.4
22: HW2021-01-23.0023.mqd	1:1 (0.5x10^5:0.5x10^5)	9.5	43.6
23: HW2021-01-23.0024.mqd	3:1 (0.5x10^5:1.5x10^4)	12	44
24: HW2021-01-23.0025.mqd	NK	12.9	39.2
Mean		10.3	33.8
StdDev		3.8	14.3

## Sheet: Fig4B source data
												/4
Name				Dilution	IFN-g	IL-5	TNF-a	IL-2	IL-6	IL-4	IL-10	IL-9	IL-17A	IL-17F	IL-22	IL-13		IL-1a	IL-1b	IL-3	IL-12p40	IL-12p70	IL-23	IL-7	IL-11	IL-27	IL-33	IFN-b	GM-CSF	TSLP		RANTES	MIP-3a	Eotaxin	TARC	CCL7	CCL2	CXCL9	CXCL10	MPI-1a	MPI-1b	CXCL13	CXCL5	CCL22
		MAIT	NK		pg/ml	pg/ml	pg/ml	pg/ml	pg/ml	pg/ml	pg/ml	pg/ml	pg/ml	pg/ml	pg/ml	pg/ml		pg/ml	pg/ml	pg/ml	pg/ml	pg/ml	pg/ml	pg/ml	pg/ml	pg/ml	pg/ml	pg/ml	pg/ml	pg/ml		pg/ml	pg/ml	pg/ml	pg/ml	pg/ml	pg/ml	pg/ml	pg/ml	pg/ml	pg/ml	pg/ml	pg/ml	pg/ml
HW2021-01-27.0009.fcs		1	3	1	173.76	1.14	94.65	17.38	62.33	1.71	<0.37	<0.88	69.97	1.26	34.15	<1.83		4.75	<1.53	<0.70	5.24	<1.18	<5.46	11.86	5.17	<7.48	7.9	<4.13	7.19	5.25		88.02	<1.91	0.87	3.7	55.32	17.84	7.97	16.55	446	199.41	2.79	49.96	60.78
HW2021-01-27.0010.fcs		1	1	1	37.37	<1.08	34.95	14.45	17.58	1.26	<0.37	<0.88	14.04	<1.22	9.1	<1.83		<0.97	<1.53	<0.70	1.19	<1.18	<5.46	<9.83	<3.57	<7.48	<6.86	<4.13	1.25	<4.88		22.1	<1.91	<0.81	2.1	37.03	21.23	<1.13	<2.06	121.61	82.37	0.77	38.78	8.58
HW2021-01-27.0011.fcs		1	0.3	1	2.83	<1.08	5.98	14.16	3.39	0.87	0.6	<0.88	<1.59	<1.22	0.88	<1.83		<0.97	<1.53	<0.70	<0.46	<1.18	<5.46	<9.83	<3.57	<7.48	<6.86	<4.13	<1.07	<4.88		5.24	<1.91	<0.81	2.33	31.69	23.68	<1.13	<2.06	26.23	24.72	<0.70	40.85	1.52
HW2021-01-27.0012.fcs		1	0	1	0.63	<1.08	1.11	13.64	1.83	<0.65	<0.37	<0.88	<1.59	<1.22	0.45	<1.83		<0.97	<1.53	<0.70	<0.46	<1.18	<5.46	<9.83	<3.57	<7.48	<6.86	<4.13	<1.07	5.19		1.46	<1.91	<0.81	2.64	38.16	26.11	<1.13	<2.06	<1.81	<1.30	<0.70	39.46	<1.25
HW2021-01-27.0016.fcs		0	1	1	37.81	1.08	22.81	13.09	6.17	1.52	0.79	0.96	23.17	<1.22	1.61	<1.83		<0.97	<1.53	<0.70	<0.46	<1.18	<5.46	<9.83	<3.57	<7.48	<6.86	<4.13	<1.07	<4.88		15.31	<1.91	<0.81	<1.25	3.06	1.63	<1.13	<2.06	44.81	25.89	<0.70	7.01	17.84
HW2021-01-27.0017.fcs		1	3	1	170.72	1.78	115.59	17.57	80.55	1.96	0.61	1.22	50.88	<1.22	26.69	<1.83		1.34	<1.53	<0.70	3	<1.18	<5.46	<9.83	<3.57	<7.48	<6.86	<4.13	3.45	<4.88		77.71	<1.91	1.03	2.77	48.44	14.75	1.27	11.84	339.34	160.11	<0.70	42.36	65.11
HW2021-01-27.0018.fcs		1	1	1	46.22	1.09	38.43	15.05	23.76	1.33	0.96	<0.88	10.25	<1.22	5.8	<1.83		<0.97	<1.53	<0.70	0.54	<1.18	<5.46	<9.83	<3.57	<7.48	<6.86	<4.13	<1.07	<4.88		17.03	1.93	1.16	2.17	33.37	20.06	<1.13	<2.06	87.53	65.79	<0.70	36.28	7.36
HW2021-01-27.0019.fcs		1	0.3	1	5.87	<1.08	7.14	12.1	4.52	0.83	<0.37	<0.88	<1.59	<1.22	0.84	<1.83		<0.97	<1.53	<0.70	<0.46	<1.18	<5.46	<9.83	<3.57	<7.48	<6.86	<4.13	<1.07	<4.88		4.14	<1.91	<0.81	1.84	29.41	21.94	<1.13	<2.06	20.67	19.2	<0.70	39.16	<1.25
HW2021-01-27.0020.fcs		1	0	1	1.49	<1.08	3.01	12.47	2.93	0.75	0.47	<0.88	<1.59	<1.22	0.6	<1.83		<0.97	<1.53	<0.70	<0.46	<1.18	<5.46	<9.83	<3.57	<7.48	<6.86	<4.13	<1.07	<4.88		<1.41	<1.91	<0.81	1.56	28.9	20.53	<1.13	<2.06	<1.81	<1.30	<0.70	34.85	<1.25
HW2021-01-27.0024.fcs		0	1	1	12.37	<1.08	19.58	12.88	6.7	1.68	<0.37	<0.88	43.52	<1.22	2.49	<1.83		<0.97	<1.53	<0.70	0.57	<1.18	<5.46	<9.83	<3.57	<7.48	<6.86	<4.13	<1.07	<4.88		13.14	<1.91	<0.81	<1.25	2.14	2.31	<1.13	<2.06	47.24	28.3	<0.70	4.55	10.19
HW2021-01-27.0025.fcs		1	3	1	625.28	1.39	165.81	15.63	127.02	2.66	1.11	1.1	174.21	3.38	134.65	<1.83		1.24	<1.53	<0.70	4.76	<1.18	<5.46	<9.83	<3.57	<7.48	<6.86	<4.13	7.55	5.96		85.05	<1.91	<0.81	3	45.76	14.63	7.52	20.14	358.86	183.73	0.95	43.71	70.52
HW2021-01-27.0026.fcs		1	1	1	98.17	<1.08	27.52	12.18	19.21	1.23	<0.37	<0.88	3.12	<1.22	2.51	<1.83		<0.97	<1.53	<0.70	1.58	<1.18	<5.46	<9.83	<3.57	<7.48	<6.86	<4.13	1.2	<4.88		25.75	<1.91	0.82	2.61	42	22.12	1.37	3.66	139.39	99.49	0.89	64.6	10.98
HW2021-01-27.0027.fcs		1	0.3	1	5.7	<1.08	3.34	11.21	3.27	0.76	<0.37	<0.88	<1.59	<1.22	0.67	<1.83		<0.97	<1.53	<0.70	<0.46	<1.18	<5.46	<9.83	<3.57	<7.48	<6.86	<4.13	<1.07	5.49		5.29	2.08	1.58	2.71	32	21.13	<1.13	<2.06	22.43	24.41	<0.70	38.68	1.47
HW2021-01-27.0028.fcs		1	0	1	3.02	<1.08	1.39	11.43	2	0.74	<0.37	<0.88	<1.59	<1.22	0.72	<1.83		<0.97	<1.53	<0.70	<0.46	<1.18	<5.46	<9.83	<3.57	<7.48	<6.86	<4.13	<1.07	<4.88		1.68	<1.91	1.31	2.53	36.79	25.43	<1.13	<2.06	<1.81	<1.30	<0.70	48.99	<1.25
HW2021-01-27.0032.fcs		0	1	1	24.34	<1.08	16.58	12.43	5.42	1.44	<0.37	<0.88	20.05	<1.22	1.42	<1.83		<0.97	<1.53	<0.70	<0.46	<1.18	<5.46	10.97	<3.57	<7.48	<6.86	<4.13	<1.07	<4.88		7.31	<1.91	<0.81	<1.25	1.72	1.94	<1.13	<2.06	28.16	15.9	<0.70	3.08	14.54

## Sheet: Fig4C&D source data
Fig4C source data										Fig4D source data
Sample	SYBR Green I	Type	Cq	mean Cq	∆Cq	mean ∆Cq	∆∆Cq			Sample	SYBR Green I	Type	Cq	mean Cq	∆Cq	mean ∆Cq	∆∆Cq
MAIT	GAPDH CS	Unknown	20.466	20.5793						NK	GAPDH CS	Unknown	20.386	20.4507
MAIT	GAPDH CS	Unknown	20.415							NK	GAPDH CS	Unknown	20.418
MAIT	GAPDH CS	Unknown	20.857							NK	GAPDH CS	Unknown	20.548
MAIT	Grza	Unknown	31.935	32.1753	11.3557	11.596				NK	Grza	Unknown	32.815	33.2307	12.3643	12.78
MAIT	Grza	Unknown	31.949		11.3697					NK	Grza	Unknown	33.485		13.0343
MAIT	Grza	Unknown	32.642		12.0627					NK	Grza	Unknown	33.392		12.9413
MAIT	Grzb	Unknown	34.334	33.9167	13.7547	13.3373				NK	Prf-1	Unknown	29.347	29.169	8.89633	8.71833
MAIT	Grzb	Unknown	33.259		12.6797					NK	Prf-1	Unknown	29.002		8.55133
MAIT	Grzb	Unknown	34.157		13.5777					NK	Prf-1	Unknown	29.158		8.70733
MAIT	Ifng	Unknown	28.724	28.6563	8.14467	8.077				NK	Ifng	Unknown	28.634	28.8697	8.18333	8.419
MAIT	Ifng	Unknown	28.571		7.99167					NK	Ifng	Unknown	28.853		8.40233
MAIT	Ifng	Unknown	28.674		8.09467					NK	Ifng	Unknown	29.122		8.67133
MAIT	Prf-1	Unknown	28.743	28.979	8.16367	8.39967				NK	Tnf	Unknown	32.511	32.1587	12.0603	11.708
MAIT	Prf-1	Unknown	28.906		8.32667					NK	Tnf	Unknown	32.287		11.8363
MAIT	Prf-1	Unknown	29.288		8.70867					NK	Tnf	Unknown	31.678		11.2273
MAIT	Tnf	Unknown	31.295	31.3637	10.7157	10.7843				NK	Fas	Unknown	34.955	34.392	14.5043	13.9413
MAIT	Tnf	Unknown	31.472		10.8927					NK	Fas	Unknown	34.392		13.9413
MAIT	Tnf	Unknown	31.324		10.7447					NK	Fas	Unknown	33.829		13.3783
MAIT	Fas	Unknown	33.99	33.4917	13.4107	12.9123
MAIT	Fas	Unknown	33.347		12.7677					cocult NK	GAPDH CS	Unknown	20.403	20.534
MAIT	Fas	Unknown	33.138		12.5587					cocult NK	GAPDH CS	Unknown	20.535
										cocult NK	GAPDH CS	Unknown	20.664
cocult MAIT	GAPDH CS	Unknown	19.909	19.917						cocult NK	Grza	Unknown	31.832	31.807	11.298	-1.482	2.79336
cocult MAIT	GAPDH CS	Unknown	19.835							cocult NK	Grza	Unknown	31.825		11.291	-1.489	2.80694
cocult MAIT	GAPDH CS	Unknown	20.007							cocult NK	Grza	Unknown	31.764		11.23	-1.55	2.92817
cocult MAIT	Grza	Unknown	30.665	30.597	10.748	-0.848	1.8			cocult NK	Prf-1	Unknown	29.362	29.2967	8.828	0.109667	0.926802
cocult MAIT	Grza	Unknown	30.502		10.585	-1.011	2.01531			cocult NK	Prf-1	Unknown	29.204		8.67	-0.0483333	1.03407
cocult MAIT	Grza	Unknown	30.624		10.707	-0.889	1.85189			cocult NK	Prf-1	Unknown	29.324		8.79	0.0716667	0.951538
cocult MAIT	Grzb	Unknown	30.77	30.458	10.853	-2.48433	5.59576			cocult NK	Ifng	Unknown	29.176	29.0983	8.642	0.223	0.856782
cocult MAIT	Grzb	Unknown	30.231		10.314	-3.02333	8.13044			cocult NK	Ifng	Unknown	29.025		8.491	0.072	0.951318
cocult MAIT	Grzb	Unknown	30.373		10.456	-2.88133	7.36831			cocult NK	Ifng	Unknown	29.094		8.56	0.141	0.90689
cocult MAIT	Ifng	Unknown	26.989	27.043	7.072	-1.005	2.00694			cocult NK	Tnf	Unknown	31.412	31.5113	10.878	-0.83	1.77769
cocult MAIT	Ifng	Unknown	27.015		7.098	-0.979	1.9711			cocult NK	Tnf	Unknown	31.647		11.113	-0.595	1.51047
cocult MAIT	Ifng	Unknown	27.125		7.208	-0.869	1.8264			cocult NK	Tnf	Unknown	31.475		10.941	-0.767	1.70173
cocult MAIT	Prf-1	Unknown	28.332	28.538	8.415	0.0153333	0.989428			cocult NK	Fas	Unknown	34.423	34.358	13.889	-0.0523333	1.03694
cocult MAIT	Prf-1	Unknown	28.718		8.801	0.401333	0.757158			cocult NK	Fas	Unknown	34.275		13.741	-0.200333	1.14896
cocult MAIT	Prf-1	Unknown	28.564		8.647	0.247333	0.842452			cocult NK	Fas	Unknown	34.376		13.842	-0.0993333	1.07128
cocult MAIT	Tnf	Unknown	30.105	30.0743	10.188	-0.596333	1.51187
cocult MAIT	Tnf	Unknown	29.931		10.014	-0.770333	1.70566
cocult MAIT	Tnf	Unknown	30.187		10.27	-0.514333	1.42833			NK	GAPDH CS	Unknown	17.063	17.0933
cocult MAIT	Fas	Unknown	30.781	30.7037	10.864	-2.04833	4.13628			NK	GAPDH CS	Unknown	17.082
cocult MAIT	Fas	Unknown	30.659		10.742	-2.17033	4.50127			NK	GAPDH CS	Unknown	17.135
cocult MAIT	Fas	Unknown	30.671		10.754	-2.15833	4.46399			NK	Grzk	Unknown	25.527	25.7207	8.43367	8.62733
										NK	Grzk	Unknown	25.812		8.71867
										NK	Grzk	Unknown	25.823		8.72967
MAIT	GAPDH CS	Unknown	17.147	17.3123						NK	Tnfsf10	Unknown	32.164	32.3877	15.0707	15.2943
MAIT	GAPDH CS	Unknown	17.431							NK	Tnfsf10	Unknown	32.329		15.2357
MAIT	GAPDH CS	Unknown	17.359							NK	Tnfsf10	Unknown	32.67		15.5767
MAIT	Grzk	Unknown	25.866	25.704	8.55367	8.39167
MAIT	Grzk	Unknown	25.573		8.26067					cocult NK	GAPDH CS	Unknown	17.529	17.3727
MAIT	Grzk	Unknown	25.673		8.36067					cocult NK	GAPDH CS	Unknown	17.291
MAIT	Tnfsf10	Unknown	30.593	30.4777	13.2807	13.1653				cocult NK	GAPDH CS	Unknown	17.298
MAIT	Tnfsf10	Unknown	30.391		13.0787					cocult NK	Grzk	Unknown	25.888	25.8323	8.51533	-0.112	1.08073
MAIT	Tnfsf10	Unknown	30.449		13.1367					cocult NK	Grzk	Unknown	25.742		8.36933	-0.258	1.19582
										cocult NK	Grzk	Unknown	25.867		8.49433	-0.133	1.09657
cocult MAIT	GAPDH CS	Unknown	15.49	15.5913						cocult NK	Tnfsf10	Unknown	32.491	32.5017	15.1183	-0.176	1.12975
cocult MAIT	GAPDH CS	Unknown	15.623							cocult NK	Tnfsf10	Unknown	32.382		15.0093	-0.285	1.21841
cocult MAIT	GAPDH CS	Unknown	15.661							cocult NK	Tnfsf10	Unknown	32.632		15.2593	-0.035	1.02456
cocult MAIT	Grzk	Unknown	24.617	24.635	9.02567	0.634	0.644387
cocult MAIT	Grzk	Unknown	24.617		9.02567	0.634	0.644387
cocult MAIT	Grzk	Unknown	24.671		9.07967	0.688	0.620714			NK	GAPDH CS	Unknown	19.281	19.5477
cocult MAIT	Tnfsf10	Unknown	26.274	26.2947	10.6827	-2.48267	5.5893			NK	GAPDH CS	Unknown	19.797
cocult MAIT	Tnfsf10	Unknown	26.275		10.6837	-2.48167	5.58542			NK	GAPDH CS	Unknown	19.565
cocult MAIT	Tnfsf10	Unknown	26.335		10.7437	-2.42167	5.3579			NK	Grzb	Unknown	33.05	32.9857	13.5023	13.438
										NK	Grzb	Unknown	32.541		12.9933
MAIT	GAPDH CS	Unknown	20.442	20.714						NK	Grzb	Unknown	33.366		13.8183
MAIT	GAPDH CS	Unknown	20.639
MAIT	GAPDH CS	Unknown	21.061							cocult NK	GAPDH CS	Unknown	20.044	20.152
MAIT	ccl22	Unknown	28.086	28.1793	7.372	7.46533				cocult NK	GAPDH CS	Unknown	20.164
MAIT	ccl22	Unknown	28.328		7.614					cocult NK	GAPDH CS	Unknown	20.248
MAIT	ccl22	Unknown	28.124		7.41					cocult NK	Grzb	Unknown	32.206	32.377	12.054	-1.384	2.60991
MAIT	ccl3	Unknown	29.171	29.203	8.457	8.489				cocult NK	Grzb	Unknown	32.383		12.231	-1.207	2.30857
MAIT	ccl3	Unknown	29.432		8.718					cocult NK	Grzb	Unknown	32.542		12.39	-1.048	2.06766
MAIT	ccl3	Unknown	29.006		8.292
MAIT	ccl4	Unknown	32.973	34.8267	12.259	14.1127				NK	GAPDH CS	Unknown	20.794	20.743
MAIT	ccl4	Unknown	36.744		16.03					NK	GAPDH CS	Unknown	20.698
MAIT	ccl4	Unknown	34.763		14.049					NK	GAPDH CS	Unknown	20.737
MAIT	ccl5	Unknown	32.504	33.5707	11.79	12.8567				NK	ccl22	Unknown	28.509	28.559	7.766	7.816
MAIT	ccl5	Unknown	33.87		13.156					NK	ccl22	Unknown	28.644		7.901
MAIT	ccl5	Unknown	34.338		13.624					NK	ccl22	Unknown	28.524		7.781
MAIT	Il22	Unknown	28.989	29.295	8.275	8.581				NK	ccl3	Unknown	29.268	29.2547	8.525	8.51167
MAIT	Il22	Unknown	29.411		8.697					NK	ccl3	Unknown	29.34		8.597
MAIT	Il22	Unknown	29.485		8.771					NK	ccl3	Unknown	29.156		8.413
										NK	ccl4	Unknown	34.499	33.6947	13.756	12.9517
cocult MAIT	GAPDH CS	Unknown	19.822	19.921						NK	ccl4	Unknown	33.185		12.442
cocult MAIT	GAPDH CS	Unknown	19.931							NK	ccl4	Unknown	33.4		12.657
cocult MAIT	GAPDH CS	Unknown	20.01							NK	ccl5	Unknown	31.32	31.7527	10.577	11.0097
cocult MAIT	ccl22	Unknown	27.599	27.6657	7.678	0.212667	0.862941			NK	ccl5	Unknown	32.834		12.091
cocult MAIT	ccl22	Unknown	27.639		7.718	0.252667	0.839344			NK	ccl5	Unknown	31.104		10.361
cocult MAIT	ccl22	Unknown	27.759		7.838	0.372667	0.772354			NK	Il22	Unknown	28.986	29.3593	8.243	8.61633
cocult MAIT	ccl3	Unknown	28.183	28.1943	8.262	-0.227	1.1704			NK	Il22	Unknown	29.038		8.295
cocult MAIT	ccl3	Unknown	28.124		8.203	-0.286	1.21926			NK	Il22	Unknown	30.054		9.311
cocult MAIT	ccl3	Unknown	28.276		8.355	-0.134	1.09733
cocult MAIT	ccl4	Unknown	31.34	31.5223	11.419	-2.69367	6.46956			cocult NK	GAPDH CS	Unknown	20.807	20.7407
cocult MAIT	ccl4	Unknown	31.509		11.588	-2.52467	5.7544			cocult NK	GAPDH CS	Unknown	20.693
cocult MAIT	ccl4	Unknown	31.718		11.797	-2.31567	4.97835			cocult NK	GAPDH CS	Unknown	20.722
cocult MAIT	ccl5	Unknown	29.482	29.2977	9.561	-3.29567	9.81962			cocult NK	ccl22	Unknown	28.458	28.5963	7.71733	-0.0986667	1.07078
cocult MAIT	ccl5	Unknown	29.191		9.27	-3.58667	12.0142			cocult NK	ccl22	Unknown	28.775		8.03433	0.218333	0.859558
cocult MAIT	ccl5	Unknown	29.22		9.299	-3.55767	11.7751			cocult NK	ccl22	Unknown	28.556		7.81533	-0.000666667	1.00046
cocult MAIT	Il22	Unknown	28.832	29.0107	8.911	0.33	0.795536			cocult NK	ccl3	Unknown	28.752	28.9443	8.01133	-0.500333	1.41454
cocult MAIT	Il22	Unknown	28.5		8.579	-0.002	1.00139			cocult NK	ccl3	Unknown	29.02		8.27933	-0.232333	1.17473
cocult MAIT	Il22	Unknown	29.7		9.779	1.198	0.435879			cocult NK	ccl3	Unknown	29.061		8.32033	-0.191333	1.14182
										cocult NK	ccl4	Unknown	33.104	33.471	12.3633	-0.588333	1.50351
										cocult NK	ccl4	Unknown	33.269		12.5283	-0.423333	1.34102
MAIT	GAPDH CS	Unknown	18.536	18.731						cocult NK	ccl4	Unknown	34.04		13.2993	0.347667	0.785854
MAIT	GAPDH CS	Unknown	18.811							cocult NK	ccl5	Unknown	29.112	28.9223	8.37133	-2.63833	6.22612
MAIT	GAPDH CS	Unknown	18.846							cocult NK	ccl5	Unknown	28.758		8.01733	-2.99233	7.9576
MAIT	Il17a	Unknown	37.323	36.9993	18.592	18.2683				cocult NK	ccl5	Unknown	28.897		8.15633	-2.85333	7.22668
MAIT	Il17a	Unknown	36.605		17.874					cocult NK	Il22	Unknown	29.05	29.4717	8.30933	-0.307	1.23713
MAIT	Il17a	Unknown	37.07		18.339					cocult NK	Il22	Unknown	29.596		8.85533	0.239	0.847332
MAIT	Il6	Unknown	40.228	41.0683	21.497	22.3373				cocult NK	Il22	Unknown	29.769		9.02833	0.412	0.751581
MAIT	Il6	Unknown	42.22		23.489
MAIT	Il6	Unknown	40.757		22.026
										NK	GAPDH CS	Unknown	18.448	18.5297
cocult MAIT	GAPDH CS	Unknown	17.922	18.088						NK	GAPDH CS	Unknown	18.509
cocult MAIT	GAPDH CS	Unknown	18.141							NK	GAPDH CS	Unknown	18.632
cocult MAIT	GAPDH CS	Unknown	18.201							NK	Il17a	Unknown	33.774	35.3417	15.2443	16.812
cocult MAIT	Il17a	Unknown	30.128	30.492	12.04	-6.22833	74.9748			NK	Il17a	Unknown	36.318		17.7883
cocult MAIT	Il17a	Unknown	30.324		12.236	-6.03233	65.4505			NK	Il17a	Unknown	35.933		17.4033
cocult MAIT	Il17a	Unknown	31.024		12.936	-5.33233	40.2895			NK	Il6	Unknown	34.997	35.803	16.4673	17.2733
cocult MAIT	Il6	Unknown	32.914	33.7063	14.826	-7.51133	182.447			NK	Il6	Unknown	35.393		16.8633
cocult MAIT	Il6	Unknown	34.321		16.233	-6.10433	68.7998			NK	Il6	Unknown	37.019		18.4893
cocult MAIT	Il6	Unknown	33.884		15.796	-6.54133	93.1403
										cocult NK	GAPDH CS	Unknown	18.817	18.83
										cocult NK	GAPDH CS	Unknown	18.793
										cocult NK	GAPDH CS	Unknown	18.88
										cocult NK	Il17a	Unknown	37.473	undetected
										cocult NK	Il17a	Unknown	34.822	undetected
										cocult NK	Il17a	Unknown	36.718	undetected
										cocult NK	Il6	Unknown	39.759	undetected
										cocult NK	Il6	Unknown	36.701	undetected
										cocult NK	Il6	Unknown	41.143	undetected

## Sheet: Fig4E source data
on NK	Sample:			CD107a-CD69+	CD107a+CD69+	CD107a+CD69-	CD107a-CD69-		CD25-CD69+	CD25+CD69+	CD69+			CD25+CD69-	CD25-CD69-	CD69-PE-Cy7-A)	CD25-BV711-A)	CD107a-BV421-A)
	A9.fcs	B6 NK		9.8	23	21.3	45.9		31.7	0.5	32.2			0.3	67.5	300.2	93.7	331
	C4.fcs	B6 NK		15.4	24.5	21	39		38.4	0.5	38.9			0.1	61	422.4	145.4	391.9
	A7.fcs	B6 NK+reMAIT		7	34.5	35.3	23.3		35.9	4.3	40.2			2.4	57.3	371.2	197	1060.6
	C7.fcs	B6 NK+reMAIT		5.6	33	33.8	27.6		35.9	1.9	37.8			0.8	61.4	347.5	117.5	847.7
	B9.fcs	B6 NK	Yac-1	21.8	39.7	13.8	24.6		59.9	0.5	60.4			0.1	39.5	783.8	125.4	461.6
	D4.fcs	B6 NK	Yac-1	23.5	36.9	12.3	27.3		58.9	0.5	59.4			0.1	40.6	793.6	149.2	400.8
	B7.fcs	B6 NK+reMAIT	Yac-1	21	35.1	10.8	33		52.5	2.6	55.1			0.6	44.3	615.6	111.8	294
	D7.fcs	B6 NK+reMAIT	Yac-1	18.9	38.1	14.1	28.9		53.6	2.3	55.9			0.4	43.7	618.1	98.2	370.8
		B6NK (NK cells from C57BL/6 mouse)
on reMAIT	Sample:			CD107a-CD69+	CD107a+CD69+	CD107a+CD69-	CD107a-CD69-		CD25-CD69+	CD25+CD69+				CD25+CD69-	CD25-CD69-	CD69-PE-Cy7-A)	CD25-BV711-A)	CD107a-BV421-A)
	A1.fcs	reMAIT		0	0.9	96.5	2.6		0.8	0	0.8			0.1	99.1	29.4	265.1	3382.1
	C1.fcs	reMAIT		0	1.3	96.3	2.4		1.1	0.1	1.2			0.3	98.5	55.9	772.4	3447.4
	A7.fcs	B6 NK+reMAIT		0.8	15	81.4	2.8		11.3	3.9	15.2			5.1	79.6	116.5	583	4008.5
	C7.fcs	B6 NK+reMAIT		1	20.2	75.5	3.3		17.7	3	20.7			3.2	76	152.8	491.8	3856.4
	B1.fcs	reMAIT	Yac-1	0	20.9	78.4	0.7		19.9	0.5	20.4			0.5	79.1	237.2	744.2	5595.4
	D1.fcs	reMAIT	Yac-1	0	24.2	75	0.8		21.8	1.8	23.6			1.4	75	297.8	1708.7	5547.3
	B7.fcs	B6 NK+reMAIT	Yac-1	1.1	41.2	55.3	2.4		31.6	10.3	41.9			3.7	54.4	455.6	1010.5	5080.6
	D7.fcs	B6 NK+reMAIT	Yac-1	1.5	43.9	51.6	3		36.5	8.5	45			2.2	52.7	468.8	592	4706.5

## Sheet: Fig4F source data
		E/T ratio	Zombie+ of CFSE+yac	mean	%lysis
HW2020-12-22.0029.mqd	ctrl		5.1	6.1
HW2020-12-22.0032.mqd	ctrl		7
HW2020-12-22.0033.mqd	ctrl		6.2
HW2020-12-22.0034.mqd	NK	1:1	5.5		12.234
HW2020-12-22.0035.mqd	NK	1:1	8.1		15
HW2020-12-22.0036.mqd	NK	1:1	8.2		15.1064
HW2020-12-22.0037.mqd	NK	3:1	9.3		16.2766
HW2020-12-22.0038.mqd	NK	3:1	8.5		15.4255
HW2020-12-22.0039.mqd	NK	3:1	13.6		20.8511
HW2020-12-22.0040.mqd	NK	10:1	20.3		27.9787
HW2020-12-22.0041.mqd	NK	10:1	18.7		26.2766
HW2020-12-22.0042.mqd	NK	10:1	25.9		33.9362
HW2020-12-22.0043.mqd	reMAIT	1:1	5		11.7021
HW2020-12-22.0044.mqd	reMAIT	1:1	5.3		12.0213
HW2020-12-22.0045.mqd	reMAIT	1:1	9.1		16.0638
HW2020-12-22.0046.mqd	reMAIT	3:1	12.6		19.7872
HW2020-12-22.0047.mqd	reMAIT	3:1	9.2		16.1702
HW2020-12-22.0048.mqd	reMAIT	3:1	15		22.3404
HW2020-12-22.0049.mqd	reMAIT	10:1	16.2		23.617
HW2020-12-22.0050.mqd	reMAIT	10:1	20		27.6596
HW2020-12-22.0051.mqd	reMAIT	10:1	13.5		20.7447
HW2020-12-22.0052.mqd	NK+reMAIT	1:1:1	18.7		26.2766
HW2020-12-22.0053.mqd	NK+reMAIT	1:1:1	14.8		22.1277
HW2020-12-22.0054.mqd	NK+reMAIT	1:1:1	10.3		17.3404
HW2020-12-22.0055.mqd	NK+reMAIT	3:3:1	33.3		41.8085
HW2020-12-22.0056.mqd	NK+reMAIT	3:3:1	30.8		39.1489
HW2020-12-22.0057.mqd	NK+reMAIT	3:3:1	20		27.6596
HW2020-12-22.0058.mqd	NK+reMAIT	10:10:1	32.4		40.8511
HW2020-12-22.0059.mqd	NK+reMAIT	10:10:1	37.5		46.2766
HW2020-12-22.0060.mqd	NK+reMAIT	10:10:1	29.9		38.1915

## Sheet: Fig4G source data
Sample:		E/T ratio	LLC/Dead+ | Freq. of Parent
HW2021-03-10.0014.mqd	NK	1	0.9
HW2021-03-10.0015.mqd	NK	1	0.9
HW2021-03-10.0016.mqd	NK	1	0.7
HW2021-03-10.0017.mqd	reMAIT	1	0.6
HW2021-03-10.0018.mqd	reMAIT	1	0.9
HW2021-03-10.0019.mqd	reMAIT	1	1.6
HW2021-03-10.0020.mqd	NK	3	1.3
HW2021-03-10.0021.mqd	NK	3	0.6
HW2021-03-10.0022.mqd	NK	3	1.8
HW2021-03-10.0023.mqd	reMAIT	3	1.5
HW2021-03-10.0024.mqd	reMAIT	3	1.2
HW2021-03-10.0025.mqd	reMAIT	3	0.9
HW2021-03-10.0026.mqd	NK	10	1.4
HW2021-03-10.0027.mqd	NK	10	1.6
HW2021-03-10.0028.mqd	NK	10	1.4
HW2021-03-10.0029.mqd	reMAIT	10	2.2
HW2021-03-10.0030.mqd	reMAIT	10	2.7
HW2021-03-10.0031.mqd	reMAIT	10	3.1
HW2021-03-10.0032.mqd	NK	30	0.7
HW2021-03-10.0033.mqd	NK	30	2
HW2021-03-10.0034.mqd	NK	30	2.2
HW2021-03-10.0035.mqd	reMAIT	30	4.7
HW2021-03-10.0036.mqd	reMAIT	30	5.5
HW2021-03-10.0037.mqd	reMAIT	30	3.7
HW2021-03-10.0038.mqd	NK+reMAIT	1	1.7
HW2021-03-10.0039.mqd	NK+reMAIT	1	1.8
HW2021-03-10.0040.mqd	NK+reMAIT	1	1.9
HW2021-03-10.0041.mqd	none		0
HW2021-03-10.0042.mqd	none		0
HW2021-03-10.0043.mqd	none		0
HW2021-03-10.0044.mqd	NK+reMAIT	3	2.4
HW2021-03-10.0045.mqd	NK+reMAIT	3	2.6
HW2021-03-10.0046.mqd	NK+reMAIT	3	1.9
HW2021-03-10.0047.mqd	NK+reMAIT	10	3.6
HW2021-03-10.0048.mqd	NK+reMAIT	10	6.1
HW2021-03-10.0049.mqd	NK+reMAIT	10	3.7
HW2021-03-10.0050.mqd	NK+reMAIT	30	7.2
HW2021-03-10.0051.mqd	NK+reMAIT	30	8.7
HW2021-03-10.0052.mqd	NK+reMAIT	30	8.4

## Sheet: Fig4H source data
	2022-01-27						2020/7/16
group	ID	sex	birth	genotype	day-7 2020/7/9	day-1 2020/7/15	day0 2020/7/16	day16 2020/7/31	death	survival
1	1-1	f	2020-05-11	B6	none	none	LLC 3x10^5 IV	none		-44067	8/25 end
	1-2	f	2020-05-11	B6					2020-08-18	33
	1-3	f	2020-05-11	B6					2020-08-20	35
	1-4	f	2020-05-11	B6					2020-08-08	23
	1-5	f	2020-05-11	B6					2020-08-12	27
	2-1	f	2020-05-11	B6					2020-08-24	39
	2-2	f	2020-05-11	B6					2020-08-24	39
	2-3	f	2020-05-11	B6					2020-08-24	39
	2-4	f	2020-05-11	B6					2020-08-11	26
	2-5	f	2020-05-11	B6					2020-08-09	24
3	3-1	f	2020-05-11	B6	L7-1	none		none		-44028	8/25 end
	3-2	f	2020-05-11	B6						-44028	8/25 end
	3-3	f	2020-05-11	B6						-44028	8/25 end
	3-4	f	2020-05-11	B6					2020-08-24	39
	3-5	f	2020-05-11	B6						-44028	8/25 end
	4-1	f	2020-05-11	B6						-44028	8/25 end
	4-2	f	2020-05-11	B6						-44028	8/25 end
	4-3	f	2020-05-11	B6						-44028	8/25 end
	4-4	f	2020-05-11	B6					2020-08-11	26
	4-5	f	2020-05-11	B6						-44028	8/25 end
5	5-1	f	2020-05-11	B6	none	anti-AGM		anti-AGM	2020-08-07	22
	5-2	f	2020-05-11	B6					2020-08-17	32
	5-3	f	2020-05-11	B6					2020-08-07	22
	5-4	f	2020-05-11	B6					2020-08-11	26
	5-5	f	2020-05-11	B6					2020-08-09	24
	6-1	f	2020-05-11	B6					2020-08-05	20
	6-2	f	2020-05-11	B6					2020-08-24	39
	6-3	f	2020-05-11	B6						-44028	8/25 end
	6-4	f	2020-05-11	B6					2020-08-05	20
	6-5	f	2020-05-11	B6					2020-08-07	22
7	7-1	f	2020-05-11	B6	L7-1	anti-AGM		anti-AGM	2020-08-17	32
	7-2	f	2020-05-11	B6					2020-08-06	21
	7-3	f	2020-05-11	B6					2020-08-17	32
	7-4	f	2020-05-11	B6					2020-08-07	22
	7-5	f	2020-05-11	B6						-44028	8/25 end
	8-1	f	2020-05-11	B6					2020-08-04	19
	8-2	f	2020-05-11	B6					2020-08-07	22
	8-3	f	2020-05-11	B6					2020-08-11	26
	8-4	f	2020-05-11	B6					2020-08-17	32
	8-5	f	2020-05-11	B6					2020-08-22	37
